# Supplementary material for: Radii-dependent self-assembly polynuclear lanthanide complexes as catalysts for CO2 transformation into cyclic carbonates
Source: Royal Society of Chemistry journal article supplement (doi:10.1039/d1nj03652a), 2021-01-01
Supplement: d1nj03652a1.pdf [file d1nj03652a1.pdf]

# Supporting Information

## **Radii-dependent self-assembly polynuclear lanthanide complexes as catalysts for CO<sub>2</sub> transformation into cyclic carbonates**

Changjuan Chen,<sup>a</sup> Aijiang Zhang\*<sup>a</sup>

a. College of Chemistry and Pharmaceutical Engineering,  
Huanghuai University, Zhumadian 463000, People's Republic of China.

\* corresponding author's email address: 20111205@huanghuai.edu.cn

## Table of Contents

|                                                                                                                                                                                                                                                                                                                                                                                                                                                                                             |         |
|---------------------------------------------------------------------------------------------------------------------------------------------------------------------------------------------------------------------------------------------------------------------------------------------------------------------------------------------------------------------------------------------------------------------------------------------------------------------------------------------|---------|
| <b>Figure S1.</b> Coordination polyhedron of La1 and La2 in complex <b>1</b> .....                                                                                                                                                                                                                                                                                                                                                                                                          | S3      |
| <b>Figure S2.</b> (a) Molecular structure of complex <b>2</b> . All hydrogen atoms (except for benzyl alcoholic oxygen atom of singly deprotonated H <sub>2</sub> L <sup>-</sup> anion) have been omitted for clarity; (b) Dinuclear Pr <sub>2</sub> O <sub>3</sub> core structure of Pr(III) ions in complex <b>2</b> .....                                                                                                                                                                | S3      |
| <b>Figure S3.</b> Coordination polyhedron of Pr1 and Pr2 in complex <b>2</b> .....                                                                                                                                                                                                                                                                                                                                                                                                          | S4      |
| <b>Figure S4.</b> (a) Molecular structure of complex <b>3</b> . All hydrogen atoms (except for benzyl alcoholic oxygen atom of singly deprotonated H <sub>2</sub> L <sup>-</sup> anion) have been omitted for clarity; (b) Dinuclear Eu <sub>2</sub> O <sub>3</sub> core structure of Eu(III) ions in complex <b>3</b> .....                                                                                                                                                                | S4      |
| <b>Figure S5.</b> Coordination polyhedron of Eu1 and Eu2 in complex <b>3</b> .....                                                                                                                                                                                                                                                                                                                                                                                                          | S5      |
| <b>Figure S6.</b> Coordination polyhedron of Tb1, Tb2, Tb3, Tb4, Tb5 in complex <b>4</b> .....                                                                                                                                                                                                                                                                                                                                                                                              | S5      |
| <b>Figure S7.</b> (a) Molecular structure of complex <b>5</b> . All hydrogen atoms have been omitted for clarity; (b) [Er <sub>5</sub> (μ <sub>3</sub> -O) <sub>4</sub> (μ <sub>2</sub> -O) <sub>6</sub> ] <sup>5+</sup> core of complex <b>5</b> ; (c) [Er <sub>5</sub> (μ <sub>3</sub> -O) <sub>4</sub> (μ <sub>2</sub> -O) <sub>6</sub> ] <sup>5+</sup> core showing the dihedral angle between the two triangular motifs along with the distance between the Er <sup>3+</sup> ions..... | S6      |
| <b>Figure S8.</b> Coordination polyhedron of Er1, Er2, Er3, Er4, Er5 in complex <b>5</b> .....                                                                                                                                                                                                                                                                                                                                                                                              | S6      |
| <b>Figure S9.</b> TGA curves of complexes <b>1-5</b> .....                                                                                                                                                                                                                                                                                                                                                                                                                                  | S7      |
| <b>Figure S10.</b> <sup>1</sup> H NMR (400 MHz, DMSO- <i>d</i> <sub>6</sub> , 25 °C) spectrum of the H <sub>3</sub> L.....                                                                                                                                                                                                                                                                                                                                                                  | S7      |
| <b>Figure S11.</b> <sup>13</sup> C NMR (100 MHz, DMSO- <i>d</i> <sub>6</sub> , 25 °C) spectrum of the H <sub>3</sub> L.....                                                                                                                                                                                                                                                                                                                                                                 | S8      |
| <b>Figure S12.</b> Mass Spectrum of H <sub>3</sub> L.....                                                                                                                                                                                                                                                                                                                                                                                                                                   | S9      |
| <b>Figure S13.</b> <sup>1</sup> H NMR (400 MHz, DMSO- <i>d</i> <sub>6</sub> , 25 °C) spectrum of the complex <b>1</b> .....                                                                                                                                                                                                                                                                                                                                                                 | S10     |
| <b>Figure S14.</b> <sup>13</sup> C NMR (100 MHz, DMSO- <i>d</i> <sub>6</sub> , 25 °C) spectrum of the complex <b>1</b> .....                                                                                                                                                                                                                                                                                                                                                                | S10     |
| <b>Table S1.</b> Crystallographic and structure refinement data for complexes <b>1-5</b> .....                                                                                                                                                                                                                                                                                                                                                                                              | S11     |
| <b>Table S2.</b> Selected Bond Lengths (Å) and Angles (°) for complexes <b>1-5</b> .....                                                                                                                                                                                                                                                                                                                                                                                                    | S12-S21 |
| <b>Table S3.</b> The average Ln-O <sub>hydrazone</sub> , Ln-O <sub>alkoxy</sub> , Ln-O <sub>phenoxy</sub> , Ln-N <sub>imine</sub> bond lengths (Å) and the distances of Ln-Ln (Å) in dinuclear units or pentanuclear units for complexes <b>1-5</b> .....                                                                                                                                                                                                                                   | S22     |
| <b>Table S4.</b> Representative homogeneous lanthanide polynuclear catalysts with high TOF used for the synthesis of cyclic carbonates.....                                                                                                                                                                                                                                                                                                                                                 | S22     |
| <b>Figure S15-S29.</b> <sup>1</sup> H NMR (CDCl <sub>3</sub> ) spectrum for the cycloaddition reaction of CO <sub>2</sub> and various substrate catalyzed by complex <b>1</b> .....                                                                                                                                                                                                                                                                                                         | S23-S37 |
| <b>Figure S30-S59.</b> <sup>1</sup> H NMR and <sup>13</sup> C NMR spectra for (2a) ~ (2o).....                                                                                                                                                                                                                                                                                                                                                                                              | S38-S52 |
| <b>Notes and references</b> .....                                                                                                                                                                                                                                                                                                                                                                                                                                                           | S53     |

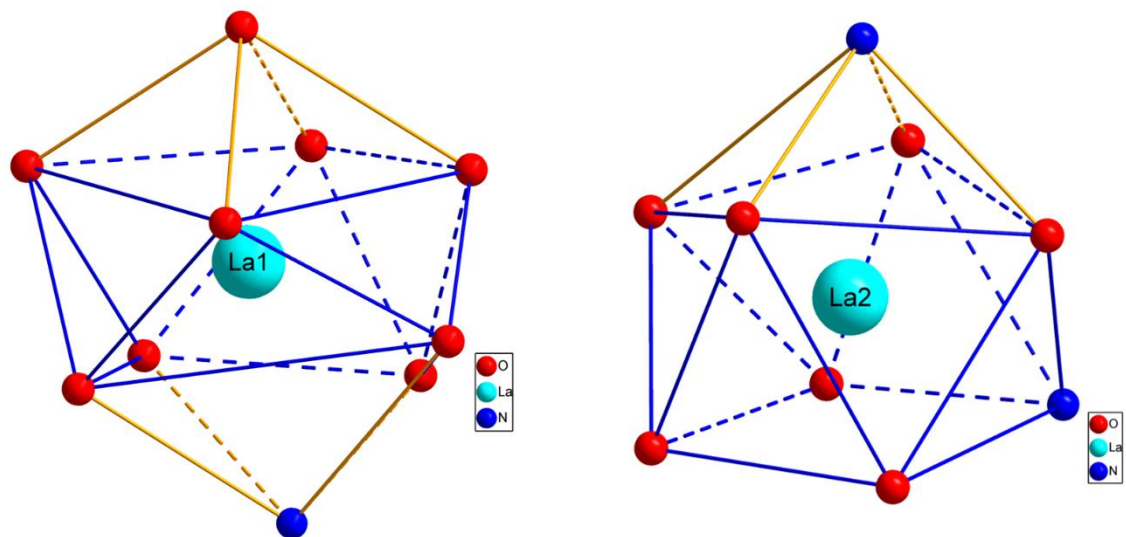

**Figure S1.** Coordination polyhedron of La1 and La2 in complex **1**.

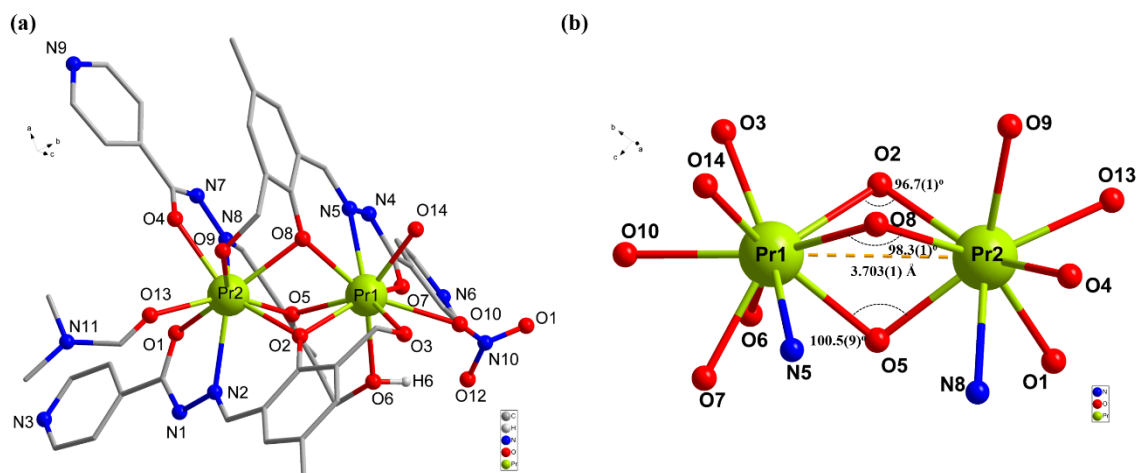

**Figure S2.** (a) Molecular structure of complex **2**. All hydrogen atoms (except for benzyl alcoholic oxygen atom of singly deprotonated  $\text{H}_2\text{L}^-$  anion) have been omitted for clarity; (b) Dinuclear  $\text{Pr}_2\text{O}_3$  core structure of Pr(III) ions in complex **2**.

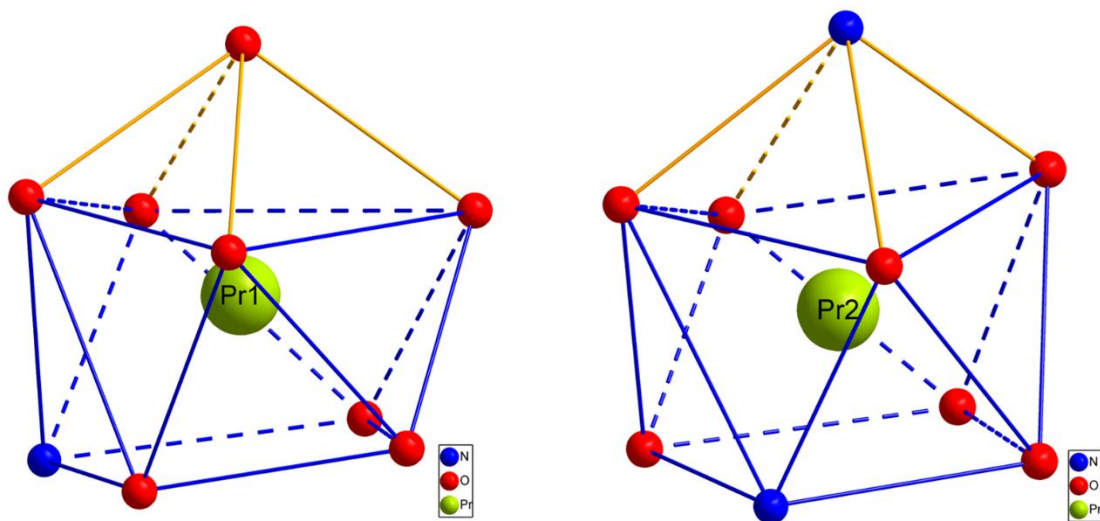

**Figure S3.** Coordination polyhedron of Pr1 and Pr2 in complex **2**.

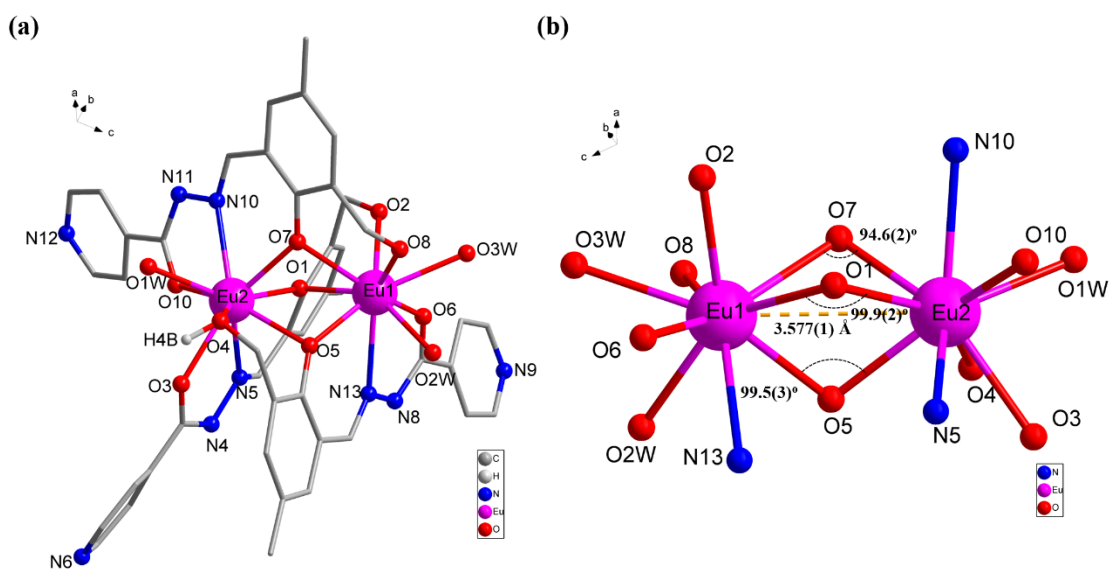

**Figure S4.** (a) Molecular structure of complex **3**. All hydrogen atoms (except for benzyl alcoholic oxygen atom of singly deprotonated  $\text{H}_2\text{L}^-$  anion) have been omitted for clarity; (b) Dinuclear  $\text{Eu}_2\text{O}_3$  core structure of Eu(III) ions in complex **3**.

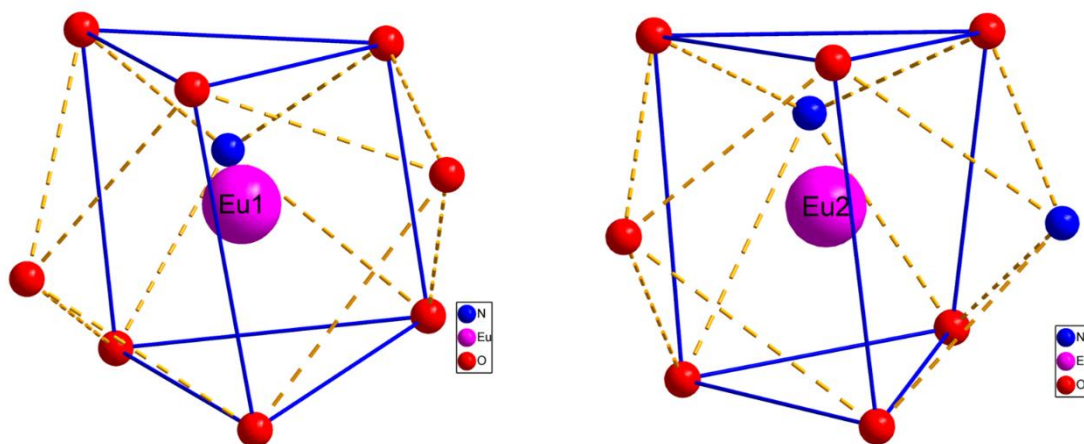

**Figure S5.** Coordination polyhedron of Eu1 and Eu2 in complex 3.

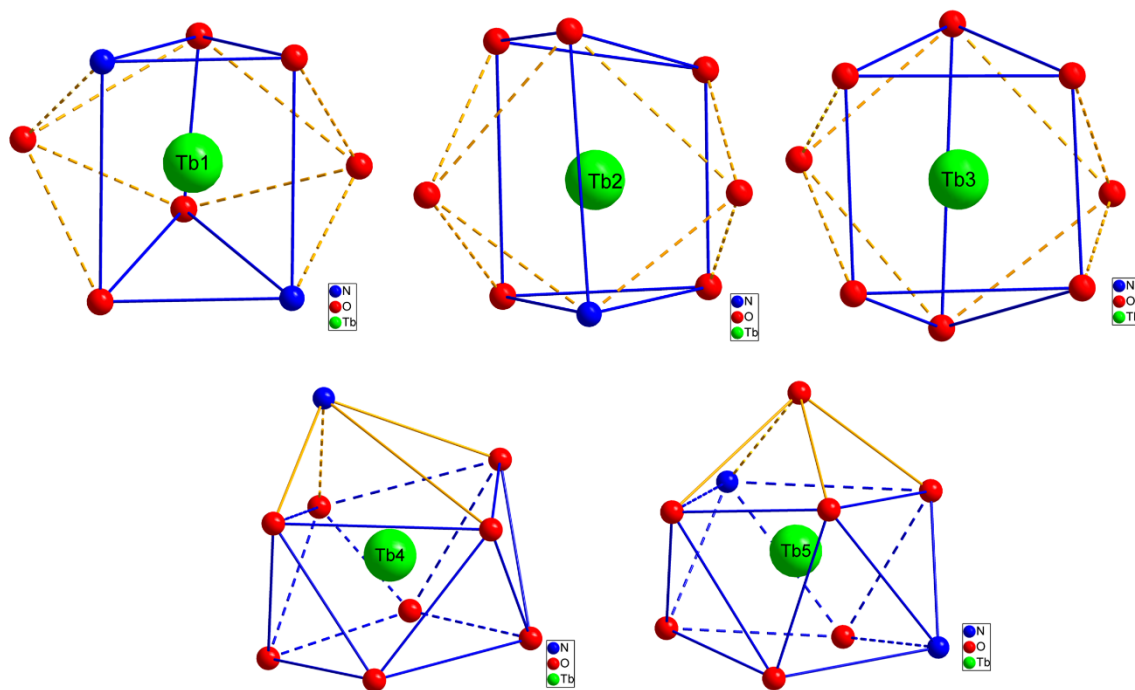

**Figure S6.** Coordination polyhedron of Tb1, Tb2, Tb3, Tb4, Tb5 in complex 4.

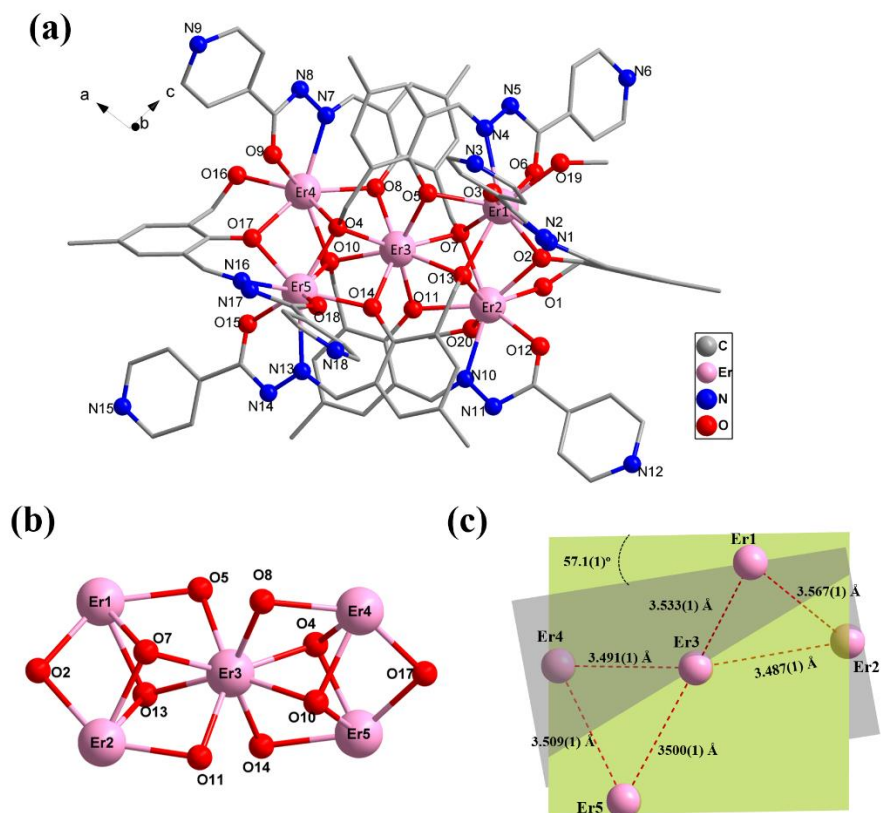

**Figure S7.** (a) Molecular structure of complex **5**. All hydrogen atoms have been omitted for clarity; (b)  $[\text{Er}_5(\mu_3\text{-O})_4(\mu_2\text{-O})_6]^{5+}$  core of complex **5**; (c)  $[\text{Er}_5(\mu_3\text{-O})_4(\mu_2\text{-O})_6]^{5+}$  core showing the dihedral angle between the two triangular motifs along with the distance between the  $\text{Er}^{3+}$  ions.

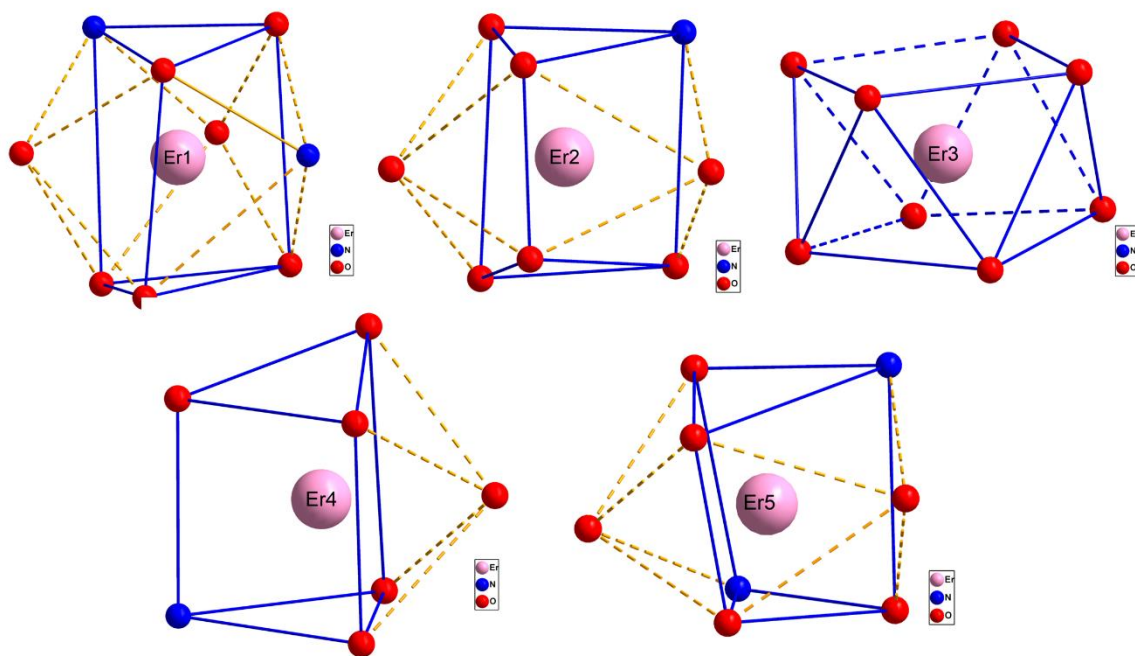

**Figure S8.** Coordination polyhedron of Er1, Er2, Er3, Er4, Er5 in complex **5**.

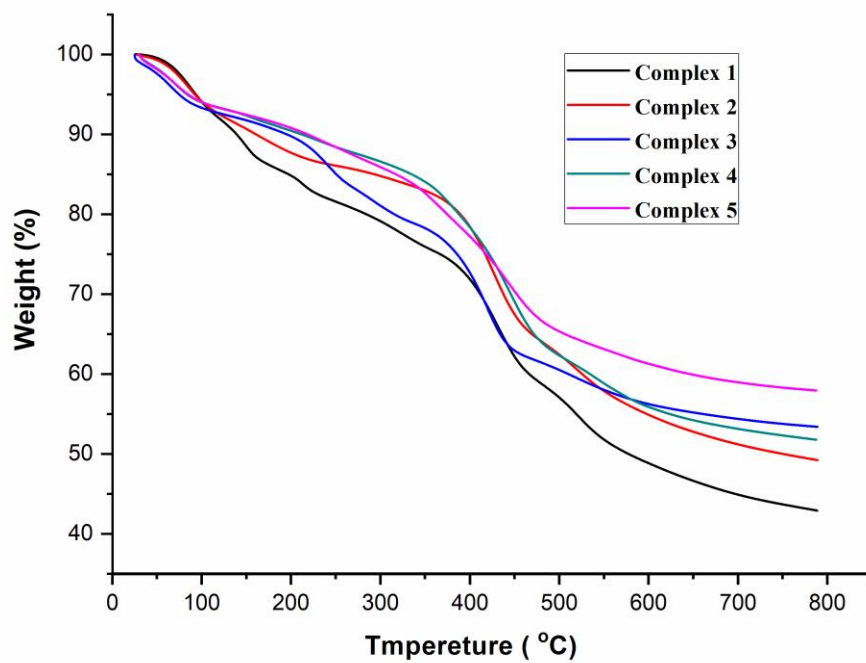

Figure S9. TGA curves of complexes 1-5.

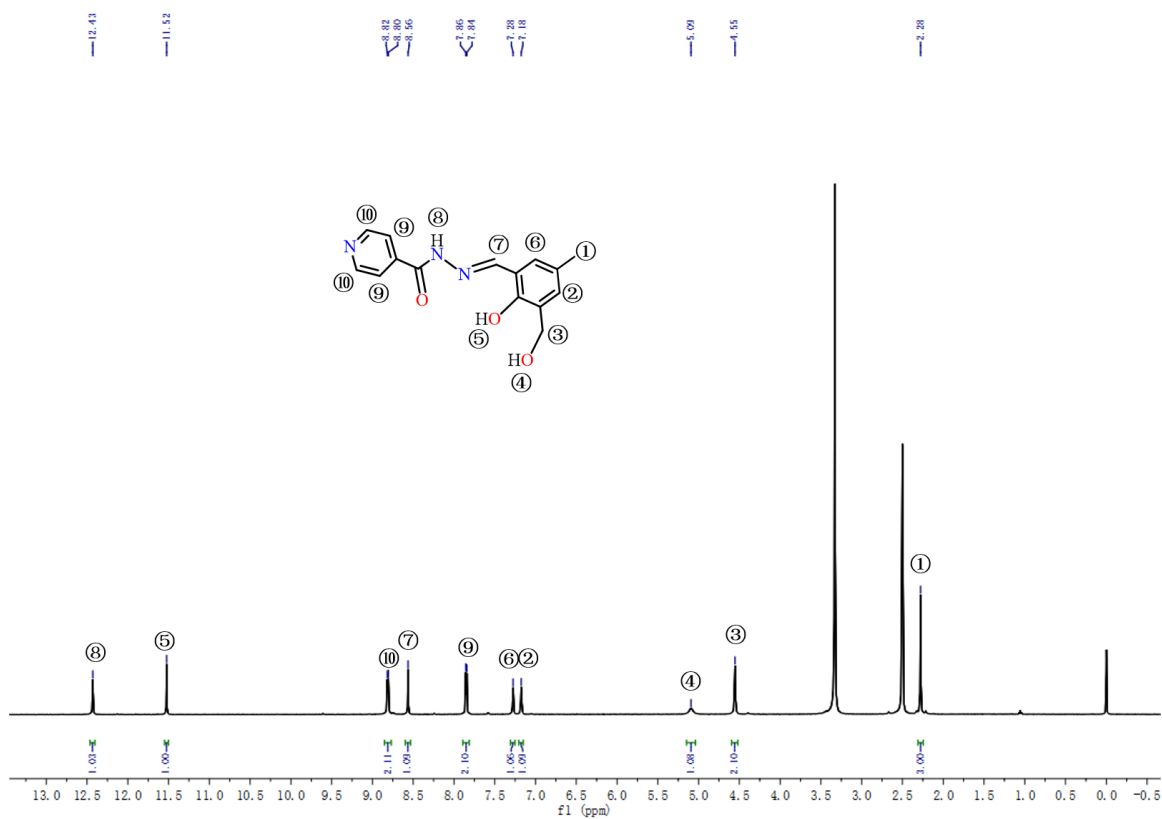

Figure S10. <sup>1</sup>H NMR (400 MHz, DMSO-d<sub>6</sub>, 25 °C) spectrum of the H<sub>3</sub>L.

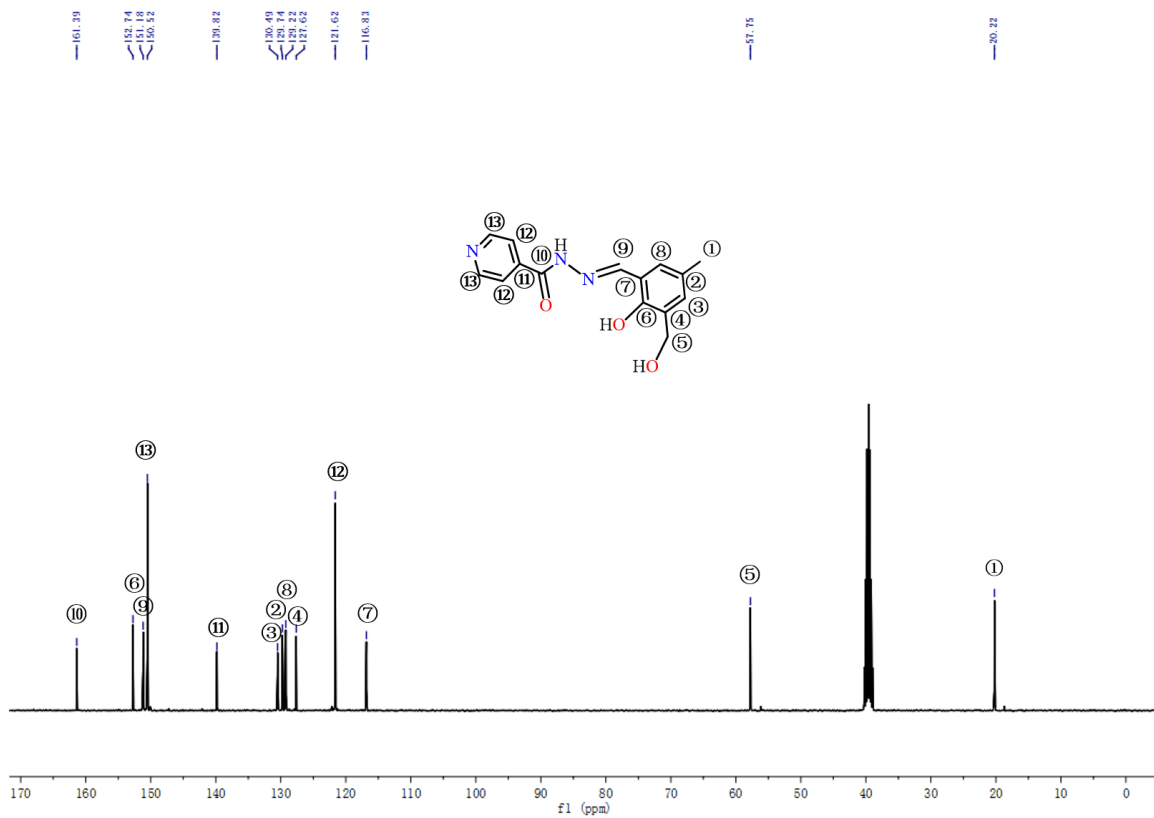

**Figure S11.** <sup>13</sup>C NMR (100 MHz, DMSO-*d*<sub>6</sub>, 25 °C) spectrum of the H<sub>3</sub>L.



# Generic Display Report

## Analysis Info

Analysis Name D:\Data\yangy\newRENFANGPING200907\_1\_15\_01\_33421.d  
Method POS\_100-1200\_For.LC.m  
Sample Name RENFANGPING200907\_1  
Comment

Acquisition Date 9/7/2020 12:35:59 PM

Operator LZU

Instrument micrOTOF

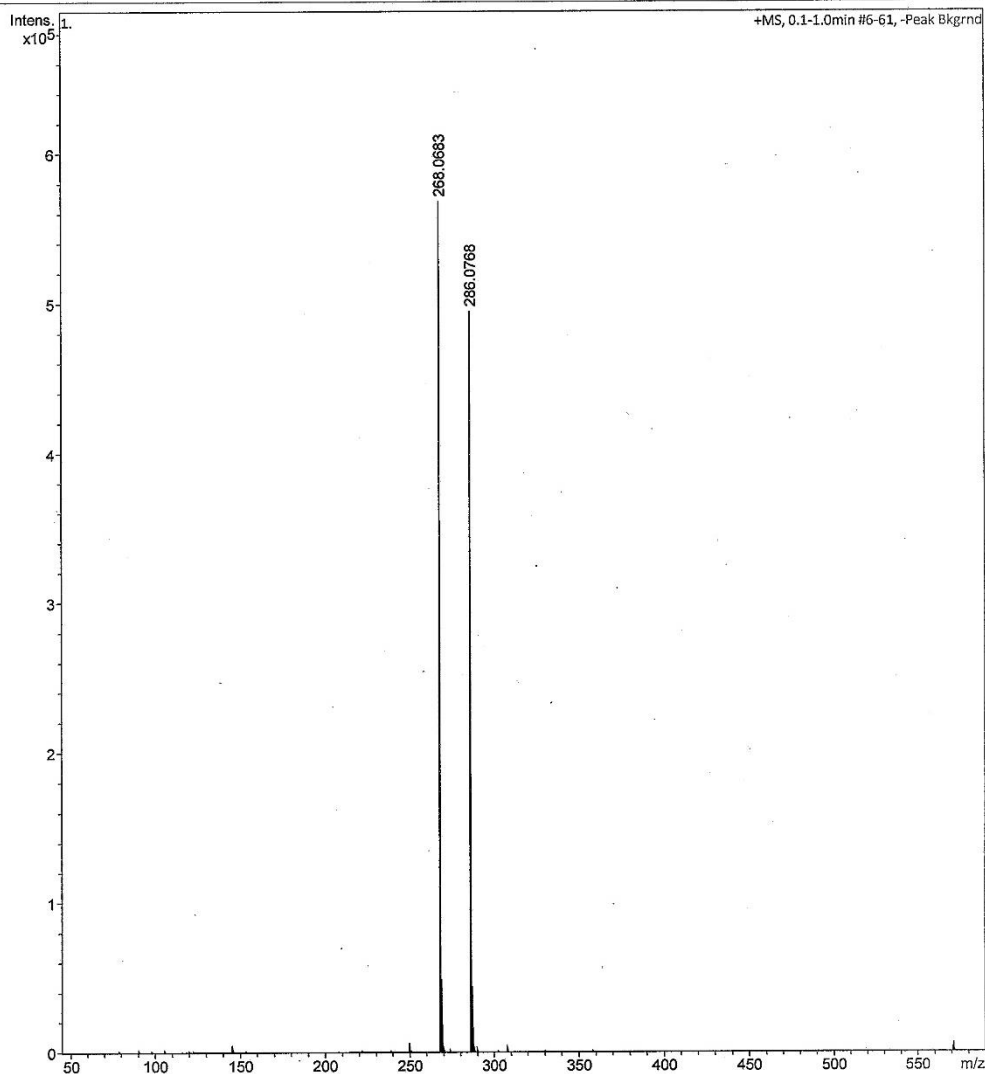

**Figure S12.** Mass Spectrum of H<sub>3</sub>L.

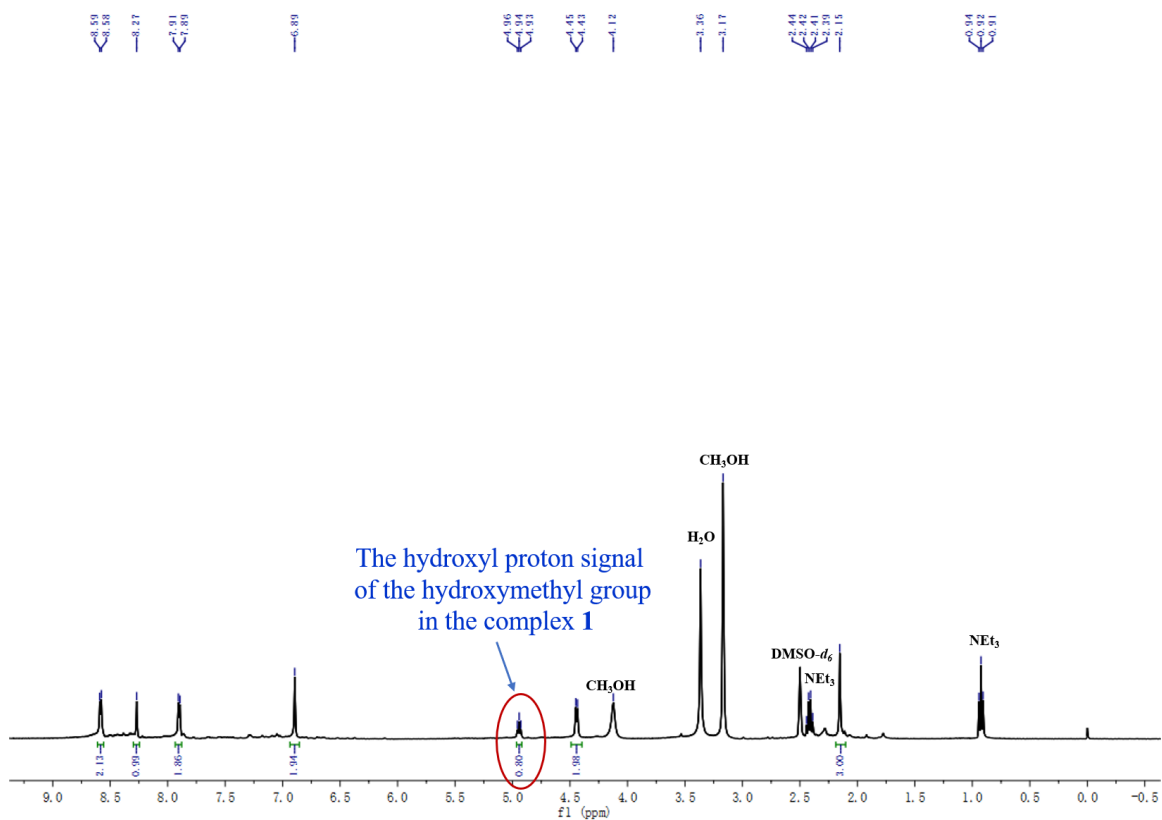

**Figure S13.**  $^1\text{H}$  NMR (400 MHz,  $\text{DMSO-}d_6$ , 25 °C) spectrum of the complex **1**.

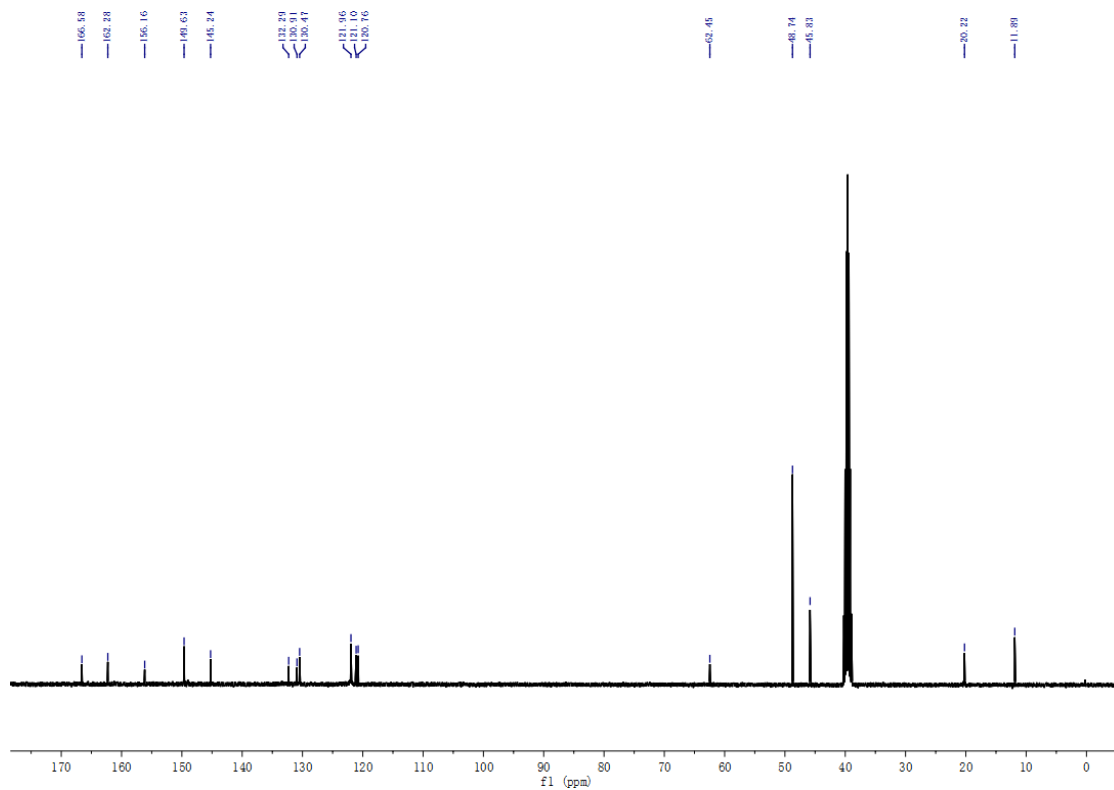

**Figure S14.**  $^{13}\text{C}$  NMR (100 MHz,  $\text{DMSO-}d_6$ , 25 °C) spectrum of the complex **1**.

**Table S1.** Crystallographic and structure refinement data for complexes **1-5**.

| Complex                                      | <b>1</b>                                                                      | <b>2</b>                                                                      | <b>3</b>                                                                      | <b>4</b>                                                                         | <b>5</b>                                                                        |
|----------------------------------------------|-------------------------------------------------------------------------------|-------------------------------------------------------------------------------|-------------------------------------------------------------------------------|----------------------------------------------------------------------------------|---------------------------------------------------------------------------------|
| Formula                                      | <b>C<sub>46</sub>H<sub>46</sub>La<sub>2</sub>N<sub>10</sub>O<sub>14</sub></b> | <b>C<sub>48</sub>H<sub>48</sub>N<sub>11</sub>O<sub>14</sub>Pr<sub>2</sub></b> | <b>C<sub>45</sub>H<sub>46</sub>Eu<sub>2</sub>N<sub>10</sub>O<sub>15</sub></b> | <b>C<sub>214</sub>H<sub>271</sub>N<sub>43</sub>O<sub>60</sub>Tb<sub>10</sub></b> | <b>C<sub>124</sub>H<sub>131</sub>Er<sub>5</sub>N<sub>24</sub>O<sub>33</sub></b> |
| <i>F</i> <sub>w</sub>                        | 1240.75                                                                       | 1284.79                                                                       | 1270.84                                                                       | 5994.92                                                                          | 3321.82                                                                         |
| <i>T</i> (K)                                 | 173(2)                                                                        | 296.1(5)                                                                      | 296.1(5)                                                                      | 291.1(5)                                                                         | 291.1(5)                                                                        |
| Crystal system                               | Monoclinic                                                                    | Monoclinic                                                                    | Monoclinic                                                                    | Monoclinic                                                                       | Monoclinic                                                                      |
| Space group                                  | <i>P</i> <sub>2</sub> <sub>1</sub> / <i>c</i>                                 | <i>P</i> <sub>2</sub> <sub>1</sub> / <i>c</i>                                 | <i>P</i> <sub>2</sub> <sub>1</sub> / <i>n</i>                                 | <i>P</i> <sub>2</sub> <sub>1</sub> / <i>c</i>                                    | <i>P</i> <sub>2</sub> <sub>1</sub> / <i>c</i>                                   |
| <i>a</i> (Å)                                 | 17.973(3)                                                                     | 17.4217(14)                                                                   | 17.693(16)                                                                    | 36.9338(14)                                                                      | 35.3440(16)                                                                     |
| <i>b</i> (Å)                                 | 14.747(2)                                                                     | 14.6810(11)                                                                   | 16.389(5)                                                                     | 20.8248(13)                                                                      | 20.8374(14)                                                                     |
| <i>c</i> (Å)                                 | 27.502(4)                                                                     | 27.191(2)                                                                     | 24.679(8)                                                                     | 21.7478(13)                                                                      | 21.3950(15)                                                                     |
| <i>α</i> (deg)                               | 90                                                                            | 90                                                                            | 90                                                                            | 90                                                                               | 90.00                                                                           |
| <i>β</i> (deg)                               | 97.637(3)                                                                     | 106.684(2)                                                                    | 107.611(5)                                                                    | 101.087(3)                                                                       | 100.671(3)                                                                      |
| <i>γ</i> (deg)                               | 90                                                                            | 90                                                                            | 90                                                                            | 90                                                                               | 90.00                                                                           |
| <i>V</i> Å <sup>3</sup>                      | 7224.5(19)                                                                    | 6661.9(9)                                                                     | 6821(4)                                                                       | 16414.9(16)                                                                      | 15484.4(17)                                                                     |
| <i>Z</i>                                     | 4                                                                             | 4                                                                             | 4                                                                             | 2                                                                                | 4                                                                               |
| <i>D</i> <sub>calcd</sub> g.cm <sup>-3</sup> | 1.141                                                                         | 1.281                                                                         | 1.238                                                                         | 1.213                                                                            | 1.425                                                                           |
| <i>μ</i> (mm <sup>-1</sup> )                 | 1.22                                                                          | 1.50                                                                          | 1.88                                                                          | 2.19                                                                             | 2.75                                                                            |
| <i>F</i> (000)                               | 2472                                                                          | 2572                                                                          | 2528                                                                          | 5972                                                                             | 6588                                                                            |
| Index ranges                                 | -20 ≤ <i>h</i> ≤ 22<br>-17 ≤ <i>k</i> ≤ 18<br>-31 ≤ <i>l</i> ≤ 34             | -21 ≤ <i>h</i> ≤ 22<br>-14 ≤ <i>k</i> ≤ 19<br>-35 ≤ <i>l</i> ≤ -34            | -17 ≤ <i>h</i> ≤ 21<br>-19 ≤ <i>k</i> ≤ 19<br>-29 ≤ <i>l</i> ≤ 27             | -47 ≤ <i>h</i> ≤ 40<br>-26 ≤ <i>k</i> ≤ 19<br>-27 ≤ <i>l</i> ≤ 28                | -45 ≤ <i>h</i> ≤ 45<br>-27 ≤ <i>k</i> ≤ 25<br>-26 ≤ <i>l</i> ≤ 27               |
| Data/restr./param                            | 14852/20/660                                                                  | 15554/6/664                                                                   | 11709/820/652                                                                 | 37306/6/1796                                                                     | 35308/43/1841                                                                   |
| GOF                                          | 0.96                                                                          | 1.08                                                                          | 1.08                                                                          | 1.03                                                                             | 0.95                                                                            |
| [ <i>I</i> > 2σ( <i>I</i> )]                 | <i>R</i> <sub>1</sub> = 0.066<br><i>wR</i> <sub>2</sub> = 0.148               | <i>R</i> <sub>1</sub> = 0.041<br><i>wR</i> <sub>2</sub> = 0.117               | <i>R</i> <sub>1</sub> = 0.090<br><i>wR</i> <sub>2</sub> = 0.242               | <i>R</i> <sub>1</sub> = 0.044<br><i>wR</i> <sub>2</sub> = 0.098                  | <i>R</i> <sub>1</sub> = 0.055<br><i>wR</i> <sub>2</sub> = 0.130                 |
| CCDC number                                  | 2060402                                                                       | 2060405                                                                       | 2060404                                                                       | 2060401                                                                          | 2060403                                                                         |

**Table S2.** Selected Bond Lengths (Å) and Angles (°) for complexes **1-5**.

| <b>Complex 1</b> |           |             |           |            |           |
|------------------|-----------|-------------|-----------|------------|-----------|
| La1-O2           | 2.430 (5) | La1-O11     | 2.633 (6) | La2-O5     | 2.502 (5) |
| La1-O8           | 2.466 (5) | La1-O5      | 2.679 (5) | La2-O2     | 2.517 (5) |
| La1-O13          | 2.510 (5) | La1-O10     | 2.785 (6) | La2-O7     | 2.585 (6) |
| La1-O1           | 2.572 (5) | La1-N2      | 2.865 (6) | La2-N5     | 2.608 (6) |
| La1-O6           | 2.572 (5) | La1-La2     | 3.800 (1) | La2-O3     | 2.654 (5) |
| La1-O9           | 2.610 (5) | La2-O4      | 2.409 (6) | La2-N8     | 2.808 (7) |
| La2-O8           | 2.422 (5) |             |           |            |           |
| O2-La1-O8        | 71.3(2)   | O9-La1-O10  | 114.4 (2) | O5-La2-O14 | 108.8 (2) |
| O2-La1-O13       | 72.5(2)   | O11-La1-O10 | 47.3 (2)  | O2-La2-O14 | 132.8(2)  |
| O8-La1-O13       | 142.8 (2) | O5-La1-O10  | 159.6 (2) | O7-La2-O14 | 77.8 (2)  |
| O2-La1-O1        | 116.2 (2) | O2-La1-N2   | 62.3 (2)  | O4-La2-N5  | 61.6 (2)  |
| O8-La1-O1        | 75.0 (2)  | O8-La1-N2   | 75.9 (2)  | O8-La2-N5  | 82.4(2)   |
| O13-La1-O1       | 129.8 (2) | O13-La1-N2  | 94.3 (2)  | O5-La2-N5  | 69.7(2)   |
| O2-La1-O6        | 118.3 (2) | O1-La1-N2   | 57.8 (2)  | O2-La2-N5  | 136.6 (2) |
| O8-La1-O6        | 122.2 (2) | O6-La1-N2   | 161.7 (2) | O7-La2-N5  | 139.4(2)  |
| O13-La1-O6       | 69.8 (2)  | O9-La1-N2   | 121.1 (2) | O14-La2-N5 | 73.6 (2)  |
| O1-La1-O6        | 125.5 (2) | O11-La1-N2  | 101.8 (2) | O4-La2-O3  | 137.2 (2) |
| O2-La1-O9        | 137.8 (2) | O5-La1-N2   | 123.1 (2) | O8-La2-O3  | 136.8(2)  |
| O8-La1-O9        | 69.8 (2)  | O10-La1-N2  | 60.9 (2)  | O5-La2-O3  | 83.6 (2)  |
| O13-La1-O9       | 140.2 (2) | O2-La1-La2  | 40.7 (1)  | O2-La2-O3  | 69.3 (2)  |
| O1-La1-O9        | 67.8 (2)  | O8-La1-La2  | 38.6(1)   | O7-La2-O3  | 71.7 (2)  |
| O6-La1-O9        | 71.9 (2)  | O13-La1-La2 | 105.3 (1) | O14-La2-O3 | 63.7 (2)  |
| O2-La1-O11       | 148.4 (2) | O1-La1-La2  | 110.3 (1) | N5-La2-O3  | 118.0(2)  |
| O8-La1-O11       | 134.5 (2) | O6-La1-La2  | 109.7 (1) | O4-La2-N8  | 65.3 (2)  |
| O13-La1-O11      | 82.4 (2)  | O9-La1-La2  | 97.3 (1)  | O2-La2-N8  | 79.7 (2)  |
| O1-La1-O11       | 66.6 (2)  | O11-La1-La2 | 170.9 (2) | O7-La2-N8  | 58.6 (2)  |
| O6-La1-O11       | 68.1 (2)  | O5-La1-La2  | 41.0(1)   | O14-La2-N8 | 123.3 (2) |
| O9-La1-O11       | 73.7 (2)  | O10-La1-La2 | 140.2 (1) | N5-La2-N8  | 117.2 (2) |

|             |           |            |           |             |           |
|-------------|-----------|------------|-----------|-------------|-----------|
| O2-La1-O5   | 67.3 (2)  | N2-La1-La2 | 82.6 (1)  | O3-La2-N8   | 123.4 (2) |
| O8-La1-O5   | 64.2 (2)  | O4-La2-O8  | 85.8 (2)  | O4-La2-La1  | 125.2 (1) |
| O13-La1-O5  | 94.3 (2)  | O4-La2-O5  | 127.0 (2) | O8-La2-La1  | 39.4 (1)  |
| O1-La1-O5   | 135.5 (2) | O8-La2-O5  | 67.6 (2)  | O5-La2-La1  | 44.7 (1)  |
| O6-La1-O5   | 68.81 (2) | O4-La2-O2  | 144.0 (2) | O2-La2-La1  | 39.0 (1)  |
| O9-La1-O5   | 81.6(2)   | O5-La2-O2  | 68.9 (2)  | O7-La2-La1  | 118.5 (1) |
| O11-La1-O5  | 135.0 (2) | O4-La2-O7  | 84.5 (2)  | O14-La2-La1 | 151.4 (2) |
| O2-La1-O10  | 103.3 (2) | O8-La2-O7  | 118.8 (2) | N5-La2-La1  | 99.9 (1)  |
| O8-La1-O10  | 131.8 (2) | O5-La2-O7  | 148.5 (2) | O3-La2-La1  | 97.6 (1)  |
| O13-La1-O10 | 65.3 (2)  | O2-La2-O7  | 83.9 (2)  | N8-La2-La1  | 84.7 (1)  |
| O1-La1-O10  | 64.7 (2)  | O4-La2-O14 | 77.0 (2)  | O6-La1-O10  | 103.0 (2) |
| O8-La2-O14  | 155.0 (2) |            |           |             |           |

**Complex 2**

|            |           |             |           |            |           |
|------------|-----------|-------------|-----------|------------|-----------|
| N2-Pr2     | 2.585 (3) | O4-Pr2      | 2.492 (3) | O9-Pr2     | 2.583 (3) |
| N5-Pr1     | 2.859 (3) | O5-Pr2      | 2.392 (2) | O10-Pr1    | 2.624 (3) |
| N8-Pr2     | 2.763 (3) | O5-Pr1      | 2.423 (3) | O13-Pr2    | 2.493 (4) |
| O1-Pr2     | 2.388 (3) | O6-Pr1      | 2.543 (3) | O14-Pr1    | 2.426 (3) |
| O2-Pr2     | 2.452 (3) | O7-Pr1      | 2.454 (3) | Pr1-Pr2    | 3.703 (1) |
| O2-Pr1     | 2.503 (3) | O8-Pr1      | 2.379 (3) | O3-Pr1     | 2.487 (3) |
| O8-Pr2     | 2.514 (3) |             |           |            |           |
| O8-Pr1-O5  | 72.3 (1)  | O14-Pr1-N5  | 75.4 (1)  | O1-Pr2-O9  | 140.8 (1) |
| O8-Pr1-O14 | 78.6 (1)  | O7-Pr1-N5   | 57.6 (1)  | O5-Pr2-O9  | 137.2 (1) |
| O5-Pr1-O14 | 145.5 (1) | O3-Pr1-N5   | 149.6 (1) | O2-Pr2-O9  | 81.9 (1)  |
| O8-Pr1-O7  | 118.9 (1) | O2-Pr1-N5   | 123.6 (1) | O13-Pr2-O9 | 67.2 (1)  |
| O5-Pr1-O7  | 81.5 (1)  | O6-Pr1-N5   | 120.6 (1) | O4-Pr2-O9  | 70.0(1)   |
| O14-Pr1-O7 | 97.0 (1)  | O10-Pr1-N5  | 109.3 (1) | O8-Pr2-O9  | 69.2 (1)  |
| O8-Pr1-O3  | 108.5 (1) | O8-Pr1-Pr2  | 42.2 (1)  | O1-Pr2-N2  | 63.2 (1)  |
| O5-Pr1-O3  | 132.7 (1) | O5-Pr1-Pr2  | 39.4 (1)  | O5-Pr2-N2  | 86.2 (1)  |
| O14-Pr1-O3 | 74.2 (1)  | O14-Pr1-Pr2 | 119.9 (1) | O2-Pr2-N2  | 68.6 (1)  |
| O7-Pr1-O3  | 129.1 (1) | O7-Pr1-Pr2  | 117.6 (1) | O13-Pr2-N2 | 68.5 (1)  |
| O8-Pr1-O2  | 66.8(1)   | O3-Pr1-Pr2  | 109.5(1)  | O4-Pr2-N2  | 137.2 (1) |
| O5-Pr1-O2  | 67.7 (1)  | O2-Pr1-Pr2  | 41.06 (6) | O8-Pr2-N2  | 133.4 (7) |

|             |           |             |           |             |           |
|-------------|-----------|-------------|-----------|-------------|-----------|
| O14-Pr1-O2  | 117.0 (1) | O6-Pr1-Pr2  | 96.2 (1)  | O9-Pr2-N2   | 112.2 (1) |
| O7-Pr1-O2   | 145.6 (1) | O10-Pr1-Pr2 | 163.0 (1) | O1-Pr2-N8   | 68.4 (1)  |
| O3-Pr1-O2   | 69.8 (1)  | N5-Pr1-Pr2  | 83.7 (1)  | O5-Pr2-N8   | 64.1 (1)  |
| O8-Pr1-O6   | 138.3 (1) | O1-Pr2-O5   | 82.0 (1)  | O2-Pr2-N8   | 128.7 (1) |
| O5-Pr1-O6   | 69.4 (1)  | O1-Pr2-O2   | 124.6 (1) | O13-Pr2-N8  | 120.8 (1) |
| O14-Pr1-O6  | 142.8 (1) | O5-Pr2-O2   | 69.0 (1)  | O4-Pr2-N8   | 59.4 (1)  |
| O7-Pr1-O6   | 71.2 (1)  | O1-Pr2-O13  | 75.8 (1)  | O8-Pr2-N8   | 79.8 (1)  |
| O3-Pr1-O6   | 86.2 (1)  | O5-Pr2-O13  | 151.9 (1) | O9-Pr2-N8   | 120.4 (1) |
| O2-Pr1-O6   | 83.6 (1)  | O2-Pr2-O13  | 110.2 (1) | N2-Pr2-N8   | 125.9 (1) |
| O8-Pr1-O10  | 153.8 (1) | O1-Pr2-O4   | 87.9 (1)  | O1-Pr2-Pr1  | 121.5(1)  |
| O5-Pr1-O10  | 131.8 (1) | O5-Pr2-O4   | 122.3 (1) | O5-Pr2-Pr1  | 40.1 (1)  |
| O14-Pr1-O10 | 75.2 (1)  | O2-Pr2-O4   | 147.5 (1) | O2-Pr2-Pr1  | 42.2 (1)  |
| O7-Pr1-O10  | 64.4 (1)  | O13-Pr2-O4  | 74.3 (1)  | O13-Pr2-Pr1 | 152.0 (1) |
| O3-Pr1-O10  | 64.9 (1)  | O1-Pr2-O8   | 144.7 (1) | O4-Pr2-Pr1  | 124.4 (1) |
| O2-Pr1-O10  | 127.1 (1) | O5-Pr2-O8   | 70.5 (1)  | O8-Pr2-Pr1  | 39.5 (1)  |
| O6-Pr1-O10  | 67.9 (1)  | O2-Pr2-O8   | 65.6 (1)  | O9-Pr2-Pr1  | 97.9 (1)  |
| O8-Pr1-N5   | 62.6 (1)  | O13-Pr2-O8  | 136.3 (1) | N2-Pr2-Pr1  | 97.7 (1)  |
| O5-Pr1-N5   | 74.9 (1)  | O4-Pr2-O8   | 88.5 (1)  | N8-Pr2-Pr1  | 87.2 (1)  |

**Complex 3**

|            |           |             |           |            |           |
|------------|-----------|-------------|-----------|------------|-----------|
| Eu1-O5     | 2.298 (6) | Eu1-O7      | 2.514 (7) | Eu2-O1W    | 2.409 (8) |
| Eu1-O1     | 2.346 (7) | Eu1-N13     | 2.698 (7) | Eu2-O3     | 2.438 (6) |
| Eu1-O6     | 2.405 (7) | Eu1-Eu2     | 3.577 (1) | Eu2-O4     | 2.481 (6) |
| Eu1-O2W    | 2.423 (8) | Eu2-O1      | 2.329 (6) | Eu2-N10    | 2.602 (9) |
| Eu1-O8     | 2.442 (7) | Eu2-O7      | 2.345 (6) | Eu2-N5     | 2.707 (8) |
| Eu1-O2     | 2.450 (7) | Eu2-O10     | 2.391 (7) | Eu1-O3W    | 2.497 (8) |
| Eu2-O5     | 2.387 (6) |             |           |            |           |
| O6-Eu1-O2  | 72.9 (3)  | O3W-Eu1-Eu2 | 159.8 (2) | O4-Eu2-N10 | 116.3 (2) |
| O2W-Eu1-O2 | 140.6 (3) | O7-Eu1-Eu2  | 40.8 (2)  | O1-Eu2-N5  | 64.0 (2)  |
| O8-Eu1-O2  | 96.7 (2)  | O1-Eu2-O7   | 69.5 (2)  | O7-Eu2-N5  | 129.6 (2) |
| O5-Eu1-O3W | 152.7 (3) | O1-Eu2-O10  | 82.6 (3)  | O10-Eu2-N5 | 66.3 (3)  |
| O1-Eu1-O3W | 134.1 (3) | O7-Eu2-O10  | 126.2 (3) | O5-Eu2-N5  | 80.9 (2)  |
| O6-Eu1-O3W | 66.8 (3)  | O1-Eu2-O5   | 71.8 (2)  | O1W-Eu2-N5 | 124.8 (3) |

|             |           |             |           |             |           |
|-------------|-----------|-------------|-----------|-------------|-----------|
| O2W-Eu1-O3W | 73.4 (3)  | O7-Eu2-O5   | 66.6 (2)  | O3-Eu2-N5   | 60.5 (2)  |
| O8-Eu1-O3W  | 67.6 (3)  | O1-Eu2-O1W  | 146.5 (3) | O4-Eu2-N5   | 123.1 (2) |
| O2-Eu1-O3W  | 67.4 (3)  | O7-Eu2-O1W  | 104.7 (3) | N10-Eu2-N5  | 119.7 (3) |
| O5-Eu1-O7   | 65.3 (2)  | O10-Eu2-O1W | 74.7 (3)  | O1-Eu2-C40  | 81.5 (3)  |
| O6-Eu1-O7   | 147.1 (3) | O5-Eu2-O1W  | 137.9 (3) | O7-Eu2-C40  | 109.6 (3) |
| O2W-Eu1-O7  | 124.3 (2) | O1-Eu2-O3   | 123.4 (2) | O10-Eu2-C40 | 18.4 (3)  |
| O8-Eu1-O7   | 68.5 (3)  | O7-Eu2-O3   | 148.6 (2) | O5-Eu2-C40  | 152.8 (3) |
| O2-Eu1-O7   | 81.4 (2)  | O10-Eu2-O3  | 85.2 (2)  | O1W-Eu2-C40 | 69.2 (3)  |
| O3W-Eu1-O7  | 121.3 (3) | O5-Eu2-O3   | 89.3 (2)  | O3-Eu2-C40  | 101.1 (3) |
| O5-Eu1-N13  | 64.5 (2)  | O1W-Eu2-O3  | 79.3 (3)  | O4-Eu2-C40  | 136.5 (3) |
| O6-Eu1-N13  | 60.5 (2)  | O1-Eu2-O4   | 139.6 (2) | N10-Eu2-C40 | 44.9 (3)  |
| O2W-Eu1-N13 | 68.9 (3)  | O7-Eu2-O4   | 82.0 (2)  | N5-Eu2-C40  | 82.5 (3)  |
| O8-Eu1-N13  | 137.0 (3) | O10-Eu2-O4  | 137.8 (3) | O1-Eu2-Eu1  | 40.1 (2)  |
| O2-Eu1-N13  | 124.5 (2) | O5-Eu2-O4   | 70.7 (2)  | O7-Eu2-Eu1  | 44.4 (2)  |
| O3W-Eu1-N13 | 114.2 (3) | O1W-Eu2-O4  | 67.3 (3)  | O10-Eu2-Eu1 | 122.5 (2) |
| O7-Eu1-N13  | 124.4 (2) | O3-Eu2-O4   | 70.7 (2)  | O5-Eu2-Eu1  | 39.3 (2)  |
| O5-Eu1-Eu2  | 41.1 (2)  | O1-Eu2-N10  | 78.6 (3)  | O1W-Eu2-Eu1 | 148.9 (2) |
| O6-Eu1-N13  | 60.5 (2)  | O7-Eu2-N10  | 66.7 (3)  | O3-Eu2-Eu1  | 124.4 (2) |
| O6-Eu1-Eu2  | 121.7 (2) | O10-Eu2-N10 | 63.2 (3)  | O4-Eu2-Eu1  | 99.6 (2)  |
| O2W-Eu1-Eu2 | 122.6 (2) | O5-Eu2-N10  | 130.9 (2) | N10-Eu2-Eu1 | 94.5 (2)  |
| O8-Eu1-Eu2  | 104.0 (2) | O1W-Eu2-N10 | 69.3 (3)  | N5-Eu2-Eu1  | 86.2 (2)  |
| O2-Eu1-Eu2  | 96.6 (2)  | O3-Eu2-N10  | 139.8 (3) | C40-Eu2-Eu1 | 118.2 (2) |

**Complex 4**

|         |           |         |           |         |           |
|---------|-----------|---------|-----------|---------|-----------|
| N3-Tb1  | 2.538 (4) | O3-Tb3  | 2.361 (3) | O16-Tb4 | 2.407 (3) |
| N6-Tb1  | 2.533 (4) | O7-Tb2  | 2.362 (3) | O17-Tb3 | 2.338 (3) |
| N9-Tb2  | 2.473 (4) | O8-Tb2  | 2.364 (3) | O17-Tb4 | 2.341 (3) |
| N12-Tb5 | 2.542 (4) | O8-Tb3  | 2.380 (3) | O18-Tb3 | 2.265 (3) |
| N15-Tb5 | 2.595(4)  | O9-Tb3  | 2.399 (3) | O18-Tb1 | 2.329 (3) |
| N18-Tb4 | 2.583 (4) | O9-Tb5  | 2.434 (3) | O18-Tb2 | 2.424 (3) |
| N19-Tb4 | 2.953 (5) | O9-Tb4  | 2.474 (3) | O19-Tb4 | 2.531 (4) |
| O1-Tb1  | 2.334 (3) | O10-Tb5 | 2.462 (3) | O20-Tb4 | 2.536 (4) |
| O2-Tb1  | 2.365 (3) | O11-Tb3 | 2.346 (3) | O22-Tb5 | 2.528 (3) |

|             |           |             |           |             |           |
|-------------|-----------|-------------|-----------|-------------|-----------|
| O2-Tb3      | 2.411 (3) | O11-Tb5     | 2.388 (3) | O23-Tb2     | 2.497 (3) |
| O3-Tb3      | 2.361 (3) | O12-Tb2     | 2.348 (3) | Tb1-Tb2     | 3.543 (1) |
| O3-Tb5      | 2.462 (3) | O12-Tb3     | 2.385 (3) | Tb1-Tb3     | 3.579(1)  |
| O3-Tb4      | 2.467 (3) | O12-Tb1     | 2.448 (3) | Tb2-Tb3     | 3.541 (1) |
| O4-Tb1      | 2.355 (3) | O13-Tb5     | 2.362 (4) | Tb3-Tb4     | 3.545 (1) |
| O5-Tb2      | 2.302 (3) | O14-Tb5     | 2.321 (3) | Tb3-Tb5     | 3.570 (1) |
| O5-Tb1      | 2.365 (3) | O14-Tb4     | 2.565 (3) | Tb4-Tb5     | 3.682 (1) |
| O6-Tb2      | 2.446 (3) | O15-Tb4     | 2.510 (3) |             |           |
| O2-Tb1-Tb2  | 101.6 (1) | O3-Tb3-O2   | 79.9 (1)  | O15-Tb4-N19 | 64.4 (1)  |
| O12-Tb1-Tb2 | 41.4 (1)  | O8-Tb3-O2   | 141.8 (1) | O19-Tb4-N19 | 24.7 (1)  |
| N6-Tb1-Tb2  | 100.2 (1) | O12-Tb3-O2  | 73.7 (1)  | O20-Tb4-N19 | 24.2 (1)  |
| N3-Tb1-Tb2  | 148.7 (1) | O9-Tb3-O2   | 135.7 (1) | O14-Tb4-N19 | 128.0 (1) |
| O18-Tb1-Tb3 | 37.7 (1)  | O18-Tb3-Tb2 | 42.6 (1)  | N18-Tb4-N19 | 90.3 (2)  |
| O1-Tb1-Tb3  | 129.7 (1) | O17-Tb3-Tb2 | 119.5 (1) | O17-Tb4-Tb3 | 40.8 (1)  |
| O4-Tb1-Tb3  | 99.7 (1)  | O11-Tb3-Tb2 | 92.4 (1)  | O16-Tb4-Tb3 | 124.8 (1) |
| O5-Tb1-Tb3  | 99.4 (1)  | O3-Tb3-Tb2  | 164.0 (1) | O3-Tb4-Tb3  | 41.5 (1)  |
| O2-Tb1-Tb3  | 42.0 (1)  | O8-Tb3-Tb2  | 41.3 (1)  | O9-Tb4-Tb3  | 42.6 (1)  |
| O12-Tb1-Tb3 | 41.6 (1)  | O12-Tb3-Tb2 | 41.3 (1)  | O15-Tb4-Tb3 | 151.1 (1) |
| N6-Tb1-Tb3  | 140.1 (1) | O9-Tb3-Tb2  | 121.2 (1) | O19-Tb4-Tb3 | 119.0 (1) |
| N3-Tb1-Tb3  | 106.9 (1) | O2-Tb3-Tb2  | 100.7 (1) | O20-Tb4-Tb3 | 95.4 (1)  |
| Tb2-Tb1-Tb3 | 59.6 (1)  | O18-Tb3-Tb4 | 120.9 (1) | O14-Tb4-Tb3 | 97.6 (1)  |
| O5-Tb2-O12  | 78.0 (1)  | O17-Tb3-Tb4 | 40.9 (1)  | N18-Tb4-Tb3 | 100.9 (1) |
| O5-Tb2-O8   | 142.4 (1) | O11-Tb3-Tb4 | 103.9 (1) | N19-Tb4-Tb3 | 109.2 (1) |
| O12-Tb2-O8  | 76.9 (1)  | O3-Tb3-Tb4  | 43.9 (1)  | O17-Tb4-Tb5 | 99.8 (1)  |
| O5-Tb2-O7   | 77.7 (1)  | O8-Tb3-Tb4  | 119.6 (1) | O16-Tb4-Tb5 | 94.5 (1)  |
| O12-Tb2-O7  | 82.5 (1)  | O12-Tb3-Tb4 | 164.8 (1) | O3-Tb4-Tb5  | 41.6 (1)  |
| O8-Tb2-O7   | 125.6 (1) | O9-Tb3-Tb4  | 44.1 (1)  | O9-Tb4-Tb5  | 40.9 (1)  |
| O5-Tb2-O18  | 72.7 (1)  | O2-Tb3-Tb4  | 92.1 (1)  | O15-Tb4-Tb5 | 104.2 (1) |
| O12-Tb2-O18 | 58.8 (1)  | Tb2-Tb3-Tb4 | 151.2(1)  | O19-Tb4-Tb5 | 160.1 (1) |
| O8-Tb2-O18  | 70.5 (1)  | O18-Tb3-Tb5 | 167.7 (1) | O20-Tb4-Tb5 | 111.4 (1) |
| O7-Tb2-O18  | 134.9 (1) | O17-Tb3-Tb5 | 103.2 (1) | O14-Tb4-Tb5 | 38.6 (1)  |
| O5-Tb2-O6   | 74.9 (1)  | O11-Tb3-Tb5 | 41.6 (1)  | N18-Tb4-Tb5 | 132.7 (1) |



|             |           |             |           |             |           |
|-------------|-----------|-------------|-----------|-------------|-----------|
| O12-Tb2-O6  | 148.8 (1) | O3-Tb3-Tb5  | 43.5 (1)  | N19-Tb4-Tb5 | 135.5 (1) |
| O8-Tb2-O6   | 134.3 (1) | O8-Tb3-Tb5  | 95.0 (1)  | Tb3-Tb4-Tb5 | 59.1 (1)  |
| O7-Tb2-O6   | 76.8 (1)  | O12-Tb3-Tb5 | 119.7 (1) | O14-Tb5-O13 | 128.3 (1) |
| O18-Tb2-O6  | 125.0 (1) | O9-Tb3-Tb5  | 42.9 (1)  | O14-Tb5-O11 | 142.2 (1) |
| O5-Tb2-N9   | 141.3 (1) | O2-Tb3-Tb5  | 119.9 (1) | O13-Tb5-O11 | 67.9 (1)  |
| O12-Tb2-N9  | 103.3 (1) | Tb2-Tb3-Tb5 | 128.3 (1) | O14-Tb5-O9  | 76.6 (1)  |
| O8-Tb2-N9   | 72.2 (1)  | Tb4-Tb3-Tb5 | 62.42 (1) | O13-Tb5-O9  | 140.1 (1) |
| O7-Tb2-N9   | 64.4 (1)  | O18-Tb3-Tb1 | 39.1 (1)  | O11-Tb5-O9  | 74.6 (1)  |
| O18-Tb2-N9  | 141.5 (1) | O17-Tb3-Tb1 | 92.1 (1)  | O14-Tb5-O10 | 72.8 (1)  |
| O6-Tb2-N9   | 88.7 (1)  | O11-Tb3-Tb1 | 118.6 (1) | O13-Tb5-O10 | 137.5 (1) |
| O5-Tb2-O23  | 115.4 (1) | O3-Tb3-Tb1  | 119.6 (1) | O11-Tb5-O10 | 121.2 (1) |
| O12-Tb2-O23 | 140.4 (1) | O8-Tb3-Tb1  | 100.6 (1) | O9-Tb5-O10  | 74.5 (1)  |
| O8-Tb2-O23  | 71.0 (1)  | O12-Tb3-Tb1 | 42.9 (1)  | O14-Tb5-O3  | 74.1 (1)  |
| O7-Tb2-O23  | 135.4 (1) | O9-Tb3-Tb1  | 165.2 (1) | O13-Tb5-O3  | 92.4 (1)  |
| O18-Tb2-O23 | 88.5 (1)  | O2-Tb3-Tb1  | 41.2 (1)  | O11-Tb5-O3  | 71.0 (1)  |
| O6-Tb2-O23  | 67.3(1)   | Tb2-Tb3-Tb1 | 59.6 (1)  | O9-Tb5-O3   | 62.2 (1)  |
| N9-Tb2-O23  | 88.5 (1)  | Tb4-Tb3-Tb1 | 127.1 (1) | O10-Tb5-O3  | 130.1 (1) |
| O5-Tb2-Tb3  | 102.0 (1) | Tb5-Tb3-Tb1 | 150.3 (1) | O14-Tb5-O22 | 93.3(1)   |
| O12-Tb2-Tb3 | 42.1 (1)  | O17-Tb4-O16 | 128.3 (1) | O13-Tb5-O22 | 71.6 (1)  |
| O8-Tb2-Tb3  | 42.0 (1)  | O17-Tb4-O3  | 74.1 (1)  | O11-Tb5-O22 | 124.2 (1) |
| O7-Tb2-Tb3  | 121.2 (1) | O16-Tb4-O3  | 85.5 (1)  | O9-Tb5-O22  | 145.2 (1) |
| O18-Tb2-Tb3 | 38.9 (1)  | O17-Tb4-O9  | 73.3 (1)  | O10-Tb5-O22 | 70.6 (1)  |
| O6-Tb2-Tb3  | 161.1 (1) | O16-Tb4-O9  | 135.5 (1) | O3-Tb5-O22  | 147.2 (1) |
| N9-Tb2-Tb3  | 103.9 (1) | O3-Tb4-O9   | 61.7 (1)  | O14-Tb5-N12 | 136.4(1)  |
| O23-Tb2-Tb3 | 98.6 (1)  | O17-Tb4-O15 | 143.6 (1) | O13-Tb5-N12 | 85.5 (1)  |
| O5-Tb2-Tb1  | 41.5 (1)  | O16-Tb4-O15 | 76.8 (1)  | O11-Tb5-N12 | 70.2 (1)  |
| O12-Tb2-Tb1 | 43.1 (1)  | O3-Tb4-O15  | 140.3 (1) | O9-Tb5-N12  | 94.4 (1)  |
| O8-Tb2-Tb1  | 102.4 (1) | O9-Tb4-O15  | 108.9 (1) | O10-Tb5-N12 | 63.7 (1)  |
| O7-Tb2-Tb1  | 95.7 (1)  | O17-Tb4-O19 | 80.3 (1)  | O3-Tb5-N12  | 138.9 (1) |
| O18-Tb2-Tb1 | 40.6 (1)  | O16-Tb4-O19 | 101.0 (1) | O22-Tb5-N12 | 69.9 (1)  |
| O6-Tb2-Tb1  | 115.3 (1) | O3-Tb4-O19  | 151.4 (1) | O14-Tb5-N15 | 66.4 (1)  |
| N9-Tb2-Tb1  | 145.3 (1) | O9-Tb4-O19  | 122.4 (1) | O13-Tb5-N15 | 62.4 (1)  |

|             |           |             |           |             |           |
|-------------|-----------|-------------|-----------|-------------|-----------|
| O23-Tb2-Tb1 | 123.0 (1) | O15-Tb4-O19 | 67.8 (1)  | O11-Tb5-N15 | 122.0 (1) |
| Tb3-Tb2-Tb1 | 60.8 (1)  | O17-Tb4-O20 | 78.5 (1)  | O9-Tb5-N15  | 134.9 (1) |
| O18-Tb3-O17 | 80.7 (1)  | O16-Tb4-O20 | 139.6 (1) | O10-Tb5-N15 | 115.4 (1) |
| O18-Tb3-O11 | 133.9 (1) | O3-Tb4-O20  | 134.3 (1) | O3-Tb5-N15  | 82.9 (1)  |
| O17-Tb3-O11 | 144.8 (1) | O9-Tb4-O20  | 75.9 (1)  | O22-Tb5-N15 | 64.4(1)   |
| O18-Tb3-O3  | 147.9 (1) | O15-Tb4-O20 | 67.4 (1)  | N12-Tb5-N15 | 130.2 (1) |
| O17-Tb3-O3  | 76.1 (1)  | O19-Tb4-O20 | 48.8 (1)  | O14-Tb5-Tb3 | 102.0 (1) |
| O11-Tb3-O3  | 73.7 (1)  | O17-Tb4-O14 | 138.4 (1) | O13-Tb5-Tb3 | 98.3 (1)  |
| O18-Tb3-O8  | 73.0 (1)  | O16-Tb4-O14 | 69.0 (1)  | O11-Tb5-Tb3 | 40.6 (1)  |
| O17-Tb3-O8  | 116.9 (1) | O3-Tb4-O14  | 70.0 (1)  | O9-Tb5-Tb3  | 42.1 (1)  |
| O11-Tb3-O8  | 76.4 (1)  | O9-Tb4-O14  | 71.7 (1)  | O10-Tb5-Tb3 | 113.9 (1) |
| O3-Tb3-O8   | 137.8 (1) | O15-Tb4-O14 | 70.6 (1)  | O3-Tb5-Tb3  | 41.2 (1)  |
| O18-Tb3-O12 | 60.6 (1)  | O19-Tb4-O14 | 138.4 (1) | O22-Tb5-Tb3 | 164.7 (1) |
| O17-Tb3-O12 | 134.6 (1) | O20-Tb4-O14 | 113.3 (1) | N12-Tb5-Tb3 | 98.5 (1)  |
| O11-Tb3-O12 | 79.0 (1)  | O17-Tb4-N18 | 73.9 (1)  | N15-Tb5-Tb3 | 121.8 (1) |
| O3-Tb3-O12  | 125.7 (1) | O16-Tb4-N18 | 60.4 (1)  | O14-Tb5-Tb4 | 43.6 (1)  |
| O8-Tb3-O12  | 75.6 (1)  | O3-Tb4-N18  | 93.7 (1)  | O13-Tb5-Tb4 | 132.2 (1) |
| O18-Tb3-O9  | 129.8 (1) | O9-Tb4-N18  | 143.4 (1) | O11-Tb5-Tb4 | 99.0 (1)  |
| O17-Tb3-O9  | 74.6 (1)  | O15-Tb4-N18 | 107.2 (1) | O9-Tb5-Tb4  | 41.7 (1)  |
| O11-Tb3-O9  | 76.1 (1)  | O19-Tb4-N18 | 66.8 (2)  | O10-Tb5-Tb4 | 89.4 (1)  |
| O3-Tb3-O9   | 64.2 (1)  | O20-Tb4-N18 | 112.9 (2) | O3-Tb5-Tb4  | 41.6 (1)  |
| O8-Tb3-O9   | 80.3 (1)  | O14-Tb4-N18 | 127.9 (1) | O22-Tb5-Tb4 | 136.8 (1) |
| O12-Tb3-O9  | 148.6 (1) | O17-Tb4-N19 | 79.3 (1)  | N12-Tb5-Tb4 | 135.0 (1) |
| O18-Tb3-O2  | 72.3 (1)  | O16-Tb4-N19 | 121.2 (1) | N15-Tb5-Tb4 | 93.3 (1)  |
| O17-Tb3-O2  | 72.5 (1)  | O3-Tb4-N19  | 150.7 (1) | Tb3-Tb5-Tb4 | 58.5 (1)  |
| O11-Tb3-O2  | 118.7 (1) | O9-Tb4-N19  | 99.3 (1)  |             |           |

**Complex 5**

|         |           |         |           |         |           |
|---------|-----------|---------|-----------|---------|-----------|
| Er1-O3  | 2.298 (4) | Er2-N10 | 2.451 (5) | Er4-O8  | 2.346 (4) |
| Er1-O2  | 2.299 (4) | Er2-O1  | 2.453 (5) | Er4-O10 | 2.370 (4) |
| Er1-O5  | 2.379 (4) | Er2-O13 | 2.459 (4) | Er4-O4  | 2.383 (4) |
| Er1-O19 | 2.391 (4) | Er2-Er3 | 3.487 (1) | Er4-O16 | 2.416 (4) |
| Er1-O7  | 2.407 (4) | Er3-O14 | 2.311 (4) | Er4-N7  | 2.486 (5) |

|            |           |             |           |             |           |
|------------|-----------|-------------|-----------|-------------|-----------|
| Er1-O6     | 2.425 (4) | Er3-O8      | 2.317 (4) | Er4-Er5     | 3.509 (1) |
| Er1-N1     | 2.430 (6) | Er3-O10     | 2.319 (4) | Er5-O15     | 2.260 (4) |
| Er1-O13    | 2.486 (4) | Er3-O5      | 2.321 (4) | Er5-O18     | 2.267 (4) |
| Er1-N4     | 2.509 (5) | Er3-O11     | 2.340 (4) | Er5-O14     | 2.318 (4) |
| Er1-Er3    | 3.533 (1) | Er3-O7      | 2.341 (4) | Er5-O4      | 2.325 (4) |
| Er1-Er2    | 3.567 (1) | Er3-O4      | 2.364 (4) | Er5-O17     | 2.357 (4) |
| Er2-O11    | 2.337 (4) | Er3-O13     | 2.409 (4) | Er5-O10     | 2.370 (4) |
| Er2-O2     | 2.339 (4) | Er3-Er4     | 3.491 (1) | Er5-N16     | 2.452 (5) |
| Er2-O12    | 2.380 (5) | Er3-Er5     | 3.500 (1) | Er5-N13     | 2.488 (5) |
| Er2-O20    | 2.397 (5) | Er4-O17     | 2.304 (4) | Er2-O7      | 2.404 (4) |
| Er4-O9     | 2.343 (4) |             |           |             |           |
| O3-Er1-O2  | 129.3 (2) | O11-Er2-Er3 | 41.8 (1)  | O17-Er4-O9  | 75.8 (2)  |
| O3-Er1-O5  | 68.2 (2)  | O2-Er2-Er3  | 99.4 (1)  | O17-Er4-O8  | 141.8 (2) |
| O2-Er1-O5  | 139.2 (2) | O12-Er2-Er3 | 131.6 (1) | O9-Er4-O8   | 124.5 (1) |
| O3-Er1-O19 | 73.1(2)   | O20-Er2-Er3 | 106.6 (1) | O17-Er4-O10 | 73.3 (1)  |
| O2-Er1-O19 | 95.5 (2)  | O7-Er2-Er3  | 42.0 (1)  | O9-Er4-O10  | 135.3 (1) |
| O5-Er1-O19 | 125.1 (1) | N10-Er2-Er3 | 100.0 (1) | O8-Er4-O10  | 70.4 (1)  |
| O3-Er1-O7  | 139.6 (2) | O1-Er2-Er3  | 131.6 (0) | O17-Er4-O4  | 75.1 (1)  |
| O2-Er1-O7  | 72.4 (2)  | O13-Er2-Er3 | 43.7 (1)  | O9-Er4-O4   | 80.1 (1)  |
| O5-Er1-O7  | 74.9 (1)  | O11-Er2-Er1 | 101.7 (1) | O8-Er4-O4   | 77.3 (1)  |
| O19-Er1-O7 | 145.4 (2) | O2-Er2-Er1  | 39.3 (1)  | O10-Er4-O4  | 61.2 (1)  |
| O3-Er1-O6  | 138.0 (1) | O12-Er2-Er1 | 98.4 (1)  | O17-Er4-O16 | 73.8 (2)  |
| O2-Er1-O6  | 72.7 (1)  | O20-Er2-Er1 | 138.3 (1) | O9-Er4-O16  | 86.2 (2)  |
| O5-Er1-O6  | 121.8 (1) | O7-Er2-Er1  | 42.2 (1)  | O8-Er4-O16  | 133.1 (2) |
| O19-Er1-O6 | 69.1 (1)  | N10-Er2-Er1 | 137.5 (1) | O10-Er4-O16 | 114.6 (1) |
| O7-Er1-O6  | 76.3 (1)  | O1-Er2-Er1  | 93.1 (1)  | O4-Er4-O16  | 148.3 (2) |
| O3-Er1-N1  | 62.1 (2)  | O13-Er2-Er1 | 44.1 (1)  | O17-Er4-N7  | 139.3 (2) |
| O2-Er1-N1  | 68.0 (2)  | Er3-Er2-Er1 | 60.1 (1)  | O9-Er4-N7   | 64.2 (2)  |
| O5-Er1-N1  | 121.3 (2) | O14-Er3-O8  | 142.8 (1) | O8-Er4-N7   | 72.9 (2)  |
| O19-Er1-N1 | 66.6 (2)  | O14-Er3-O10 | 75.5 (1)  | O10-Er4-N7  | 142.5 (2) |
| O7-Er1-N1  | 131.4 (2) | O8-Er3-O10  | 71.8 (1)  | O4-Er4-N7   | 103.5 (2) |
| O6-Er1-N1  | 115.8 (2) | O14-Er3-O5  | 117.3(1)  | O16-Er4-N7  | 95.9 (2)  |

---

|             |           |             |           |             |           |
|-------------|-----------|-------------|-----------|-------------|-----------|
| O3-Er1-O13  | 87.6 (1)  | O8-Er3-O5   | 75.7 (1)  | O17-Er4-Er3 | 101.7 (1) |
| O2-Er1-O13  | 74.2 (1)  | O10-Er3-O5  | 133.6 (1) | O9-Er4-Er3  | 118.5 (1) |
| O5-Er1-O13  | 69.9 (1)  | O14-Er3-O11 | 74.7 (1)  | O8-Er4-Er3  | 41.2 (1)  |
| O19-Er1-O13 | 145.0 (1) | O8-Er3-O11  | 116.3 (1) | O10-Er4-Er3 | 41.3 (1)  |
| O7-Er1-O13  | 64.2 (1)  | O10-Er3-O11 | 80.8 (1)  | O4-Er4-Er3  | 42.5 (1)  |
| O6-Er1-O13  | 134.3 (1) | O5-Er3-O11  | 144.4 (2) | O16-Er4-Er3 | 153.5 (1) |
| N1-Er1-O13  | 78.6 (2)  | O14-Er3-O7  | 135.8 (1) | N7-Er4-Er3  | 103.3 (1) |
| O3-Er1-N4   | 86.5 (2)  | O8-Er3-O7   | 79.6 (1)  | O17-Er4-Er5 | 41.8 (1)  |
| O2-Er1-N4   | 136.3 (2) | O10-Er3-O7  | 126.5 (1) | O9-Er4-Er5  | 93.8 (1)  |
| O5-Er1-N4   | 71.2 (2)  | O5-Er3-O7   | 77.3 (1)  | O8-Er4-Er5  | 100.9 (1) |
| O19-Er1-N4  | 69.0 (2)  | O11-Er3-O7  | 72.7 (1)  | O10-Er4-Er5 | 42.2 (1)  |
| O7-Er1-N4   | 97.1 (2)  | O14-Er3-O4  | 71.0 (1)  | O4-Er4-Er5  | 41.2 (1)  |
| O6-Er1-N4   | 63.6 (2)  | O8-Er3-O4   | 78.2 (1)  | O16-Er4-Er5 | 112.4 (1) |
| N1-Er1-N4   | 131.1 (2) | O10-Er3-O4  | 62.2 (1)  | N7-Er4-Er5  | 143.3 (1) |
| O13-Er1-N4  | 140.1 (2) | O5-Er3-O4   | 79.6 (1)  | Er3-Er4-Er5 | 60.0 (1)  |
| O3-Er1-Er3  | 98.4 (1)  | O11-Er3-O4  | 134.3 (1) | O15-Er5-O18 | 126.4 (2) |
| O2-Er1-Er3  | 98.9 (1)  | O7-Er3-O4   | 151.2 (1) | O15-Er5-O14 | 128.7 (1) |
| O5-Er1-Er3  | 40.6 (1)  | O14-Er3-O13 | 78.4(1)   | O18-Er5-O14 | 71.2 (2)  |
| O19-Er1-Er3 | 165.5 (1) | O8-Er3-O13  | 137.2 (1) | O15-Er5-O4  | 142.5 (1) |
| O7-Er1-Er3  | 41.2 (1)  | O10-Er3-O13 | 150.1 (1) | O18-Er5-O4  | 88.1 (1)  |
| O6-Er1-Er3  | 114.1 (1) | O5-Er3-O13  | 72.3 (2)  | O14-Er5-O4  | 71.5 (1)  |
| N1-Er1-Er3  | 120.4 (1) | O11-Er3-O13 | 78.3 (2)  | O15-Er5-O17 | 71.9 (2)  |
| O13-Er1-Er3 | 42.9 (1)  | O7-Er3-O13  | 66.4 (1)  | O18-Er5-O17 | 127.6 (2) |
| N4-Er1-Er3  | 99.3(1)   | O4-Er3-O13  | 121.7 (1) | O14-Er5-O17 | 141.0 (1) |
| O3-Er1-Er2  | 128.9 (1) | O14-Er3-Er2 | 92.6 (1)  | O4-Er5-O17  | 75.2 (2)  |
| O2-Er1-Er2  | 40.1 (1)  | O8-Er3-Er2  | 119.7 (1) | O15-Er5-O10 | 90.9 (1)  |
| O5-Er1-Er2  | 99.2 (1)  | O10-Er3-Er2 | 122.0 (1) | O18-Er5-O10 | 140.2 (1) |
| O19-Er1-Er2 | 135.7 (1) | O5-Er3-Er2  | 102.7 (1) | O14-Er5-O10 | 74.5 (1)  |
| O7-Er1-Er2  | 42.1 (1)  | O11-Er3-Er2 | 41.8 (1)  | O4-Er5-O10  | 62.0 (1)  |
| O6-Er1-Er2  | 91.6 (1)  | O7-Er3-Er2  | 43.4 (1)  | O17-Er5-O10 | 72.4 (1)  |
| N1-Er1-Er2  | 89.4 (1)  | O4-Er3-Er2  | 162.0 (1) | O15-Er5-N16 | 83.5 (2)  |
| O13-Er1-Er2 | 43.5 (1)  | O13-Er3-Er2 | 44.8 (1)  | O18-Er5-N16 | 65.1 (2)  |

---

---

|             |           |             |           |             |           |
|-------------|-----------|-------------|-----------|-------------|-----------|
| N4-Er1-Er2  | 138.1 (1) | O14-Er3-Er4 | 101.1 (1) | O14-Er5-N16 | 136.0 (2) |
| Er3-Er1-Er2 | 58.8 (1)  | O8-Er3-Er4  | 41.9 (1)  | O4-Er5-N16  | 101.9 (2) |
| O11-Er2-O2  | 140.5 (1) | O10-Er3-Er4 | 42.5 (1)  | O17-Er5-N16 | 70.4 (2)  |
| O11-Er2-O12 | 134.3 (1) | O5-Er3-Er4  | 91.7 (1)  | O10-Er5-N16 | 142.2 (2) |
| O2-Er2-O12  | 72.4 (2)  | O11-Er3-Er4 | 120.1 (1) | O15-Er5-N13 | 63.4 (2)  |
| O11-Er2-O20 | 72.2 (2)  | O7-Er3-Er4  | 120.9 (1) | O18-Er5-N13 | 80.4 (2)  |
| O2-Er2-O20  | 128.7 (2) | O4-Er3-Er4  | 42.9 (1)  | O14-Er5-N13 | 76.0 (2)  |
| O12-Er2-O20 | 115.5 (2) | O13-Er3-Er4 | 161.0 (1) | O4-Er5-N13  | 147.5 (2) |
| O11-Er2-O7  | 71.6 (1)  | Er2-Er3-Er4 | 153.0 (1) | O17-Er5-N13 | 135.1 (2) |
| O2-Er2-O7   | 71.8 (1)  | O14-Er3-Er5 | 41.0 (1)  | O10-Er5-N13 | 110.1 (2) |
| O12-Er2-O7  | 140.5 (2) | O8-Er3-Er5  | 101.8 (1) | N16-Er5-N13 | 100.6 (2) |
| O20-Er2-O7  | 99.9 (1)  | O10-Er3-Er5 | 42.3 (1)  | O15-Er5-Er3 | 128.8 (1) |
| O11-Er2-N10 | 71.7 (2)  | O5-Er3-Er5  | 118.0 (1) | O18-Er5-Er3 | 99.0 (1)  |
| O2-Er2-N10  | 136.7 (2) | O11-Er3-Er5 | 93.3 (1)  | O14-Er5-Er3 | 40.8 (1)  |
| O12-Er2-N10 | 65.8 (2)  | O7-Er3-Er5  | 164.6 (1) | O4-Er5-Er3  | 42.1 (1)  |
| O20-Er2-N10 | 81.1 (2)  | O4-Er3-Er5  | 41.3 (1)  | O17-Er5-Er3 | 100.3 (1) |
| O7-Er2-N10  | 141.1 (2) | O13-Er3-Er5 | 118.0 (1) | O10-Er5-Er3 | 41.2 (1)  |
| O11-Er2-O1  | 130.4 (1) | Er2-Er3-Er5 | 127.8 (1) | N16-Er5-Er3 | 143.0 (1) |
| O2-Er2-O1   | 63.9 (2)  | Er4-Er3-Er5 | 60.3 (1)  | N13-Er5-Er3 | 109.7 (1) |
| O12-Er2-O1  | 88.6 (1)  | O14-Er3-Er1 | 120.8 (1) | O15-Er5-Er4 | 100.1 (1) |
| O20-Er2-O1  | 65.7 (2)  | O8-Er3-Er1  | 92.7 (1)  | O18-Er5-Er4 | 127.2 (1) |
| O7-Er2-O1   | 90.5 (1)  | O10-Er3-Er1 | 163.7 (1) | O14-Er5-Er4 | 100.4 (1) |
| N10-Er2-O1  | 123.8 (2) | O5-Er3-Er1  | 41.9 (1)  | O4-Er5-Er4  | 42.5 (1)  |
| O11-Er2-O13 | 77.4(1)   | O11-Er3-Er1 | 102.6 (1) | O17-Er5-Er4 | 40.6 (1)  |
| O2-Er2-O13  | 74.0 (1)  | O7-Er3-Er1  | 42.7 (1)  | O10-Er5-Er4 | 42.2 (1)  |
| O12-Er2-O13 | 89.7 (1)  | O4-Er3-Er1  | 120.6 (1) | N16-Er5-Er4 | 102.0 (1) |
| O20-Er2-O13 | 149.1 (1) | O13-Er3-Er1 | 44.7 (1)  | N13-Er5-Er4 | 150. (1)  |
| O7-Er2-O13  | 64.7 (1)  | Er2-Er3-Er1 | 61.1 (1)  | Er3-Er5-Er4 | 59.7 (1)  |
| N10-Er2-O13 | 94.7 (2)  | Er4-Er3-Er1 | 126.8 (1) | O1-Er2-O13  | 136.3 (1) |
| Er5-Er3-Er1 | 151.1 (1) |             |           |             |           |

---

**Table S3.** The average Ln-O<sub>hydrazone</sub>, Ln-O<sub>alkoxy</sub>, Ln-O<sub>phenoxy</sub>, Ln-N<sub>imine</sub> bond lengths (Å) and the distances of Ln-Ln (Å) in dinuclear units or pentanuclear units for complexes **1-5**.

| Complex  | Ln-O <sub>hydrazone</sub> | Ln-O <sub>alkoxy</sub> | Ln-O <sub>phenoxy</sub> | Ln-N <sub>imine</sub> | Ln-Ln     |
|----------|---------------------------|------------------------|-------------------------|-----------------------|-----------|
| <b>1</b> | 2.522 (6)                 | 2.612 (5)              | 2.503 (5)               | 2.760 (7)             | 3.800 (1) |
| <b>2</b> | 2.445 (3)                 | 2.538 (3)              | 2.444 (3)               | 2.736 (3)             | 3.703 (1) |
| <b>3</b> | 2.411 (7)                 | 2.458 (7)              | 2.370 (7)               | 2.669 (9)             | 3.577 (1) |
| <b>4</b> | 2.380 (3)                 | 2.411(3)               | 2.374 (3)               | 2.544 (4)             | 3.577 (1) |
| <b>5</b> | 2.329 (5)                 | 2.393 (5)              | 2.331 (4)               | 2.469 (6)             | 3.515 (1) |

**Table S4.** Representative homogeneous lanthanide polynuclear catalysts with high TOF used for the synthesis of cyclic carbonates.

| Substance                       | Cat. (mol %)                            | Co-cat. (mol %) | Epoxide (Mole ratio) | T (°C) | P (MPa) | Time (h) | Yield (%) | TOF <sup>b</sup> (h <sup>-1</sup> ) | TOF <sup>c</sup> h <sup>-1</sup> Ln <sup>-1</sup> |
|---------------------------------|-----------------------------------------|-----------------|----------------------|--------|---------|----------|-----------|-------------------------------------|---------------------------------------------------|
| styrene oxide                   | Yb complex <sup>1</sup><br>0.1          | TBAB<br>0.75    | 1:1000               | 120    | 1       | 2.5      | 95        | 380                                 | 190                                               |
| 3,3-dimethyl-1,2-butylene oxide | Ce complex <sup>2</sup><br>0.25         | TBAB<br>1       | 1:400                | 90     | 0.1     | 24       | 96        | 16                                  | 4                                                 |
| styrene oxide                   | La complex <sup>3</sup><br>0.2          | TBAB<br>0.4     | 1:500                | 100    | 0.1     | 18       | 93        | 26                                  | 13                                                |
| styrene oxide                   | Sm complex <sup>4</sup><br>0.01         | TBAB<br>0.75    | 1:10000              | 120    | 1       | 1.5      | 97        | 6565                                | 1641                                              |
| styrene oxide                   | La complex<br>0.025<br><b>This work</b> | TBAB<br>0.75    | 1:1000               | 120    | 0.8     | 2        | 97        | 1940                                | 970                                               |
| styrene oxide                   | Tb complex<br>0.01<br><b>This work</b>  | TBAB<br>0.75    | 1:1000               | 120    | 0.8     | 2        | 96        | 4800                                | 960                                               |

Turnover frequency (TOF)<sup>b</sup> = (mol<sub>(product formed)</sub> per mol<sub>cat</sub> per h per molecule; Turnover frequency (TOF)<sup>c</sup> = (mol<sub>(product formed)</sub> per mol<sub>cat</sub> per h per metal)

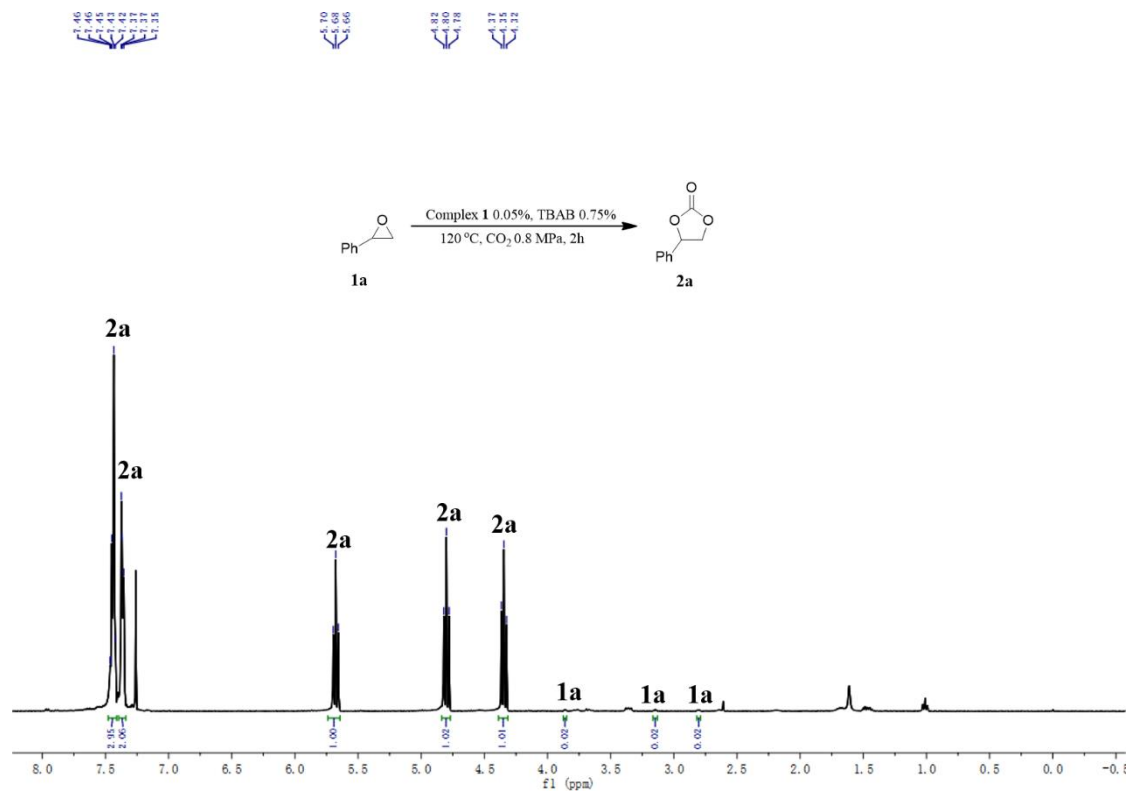

**Figure S15.** <sup>1</sup>H NMR (CDCl<sub>3</sub>) spectrum for the cycloaddition reaction of CO<sub>2</sub> and styrene oxide catalyzed by complex **1** using 10 mmol of the substrate, 0.05 mol% of catalyst (per metal), 0.75 mol % of TBAB and 8 bar CO<sub>2</sub> at 120 °C for 2 h under solvent-free condition.





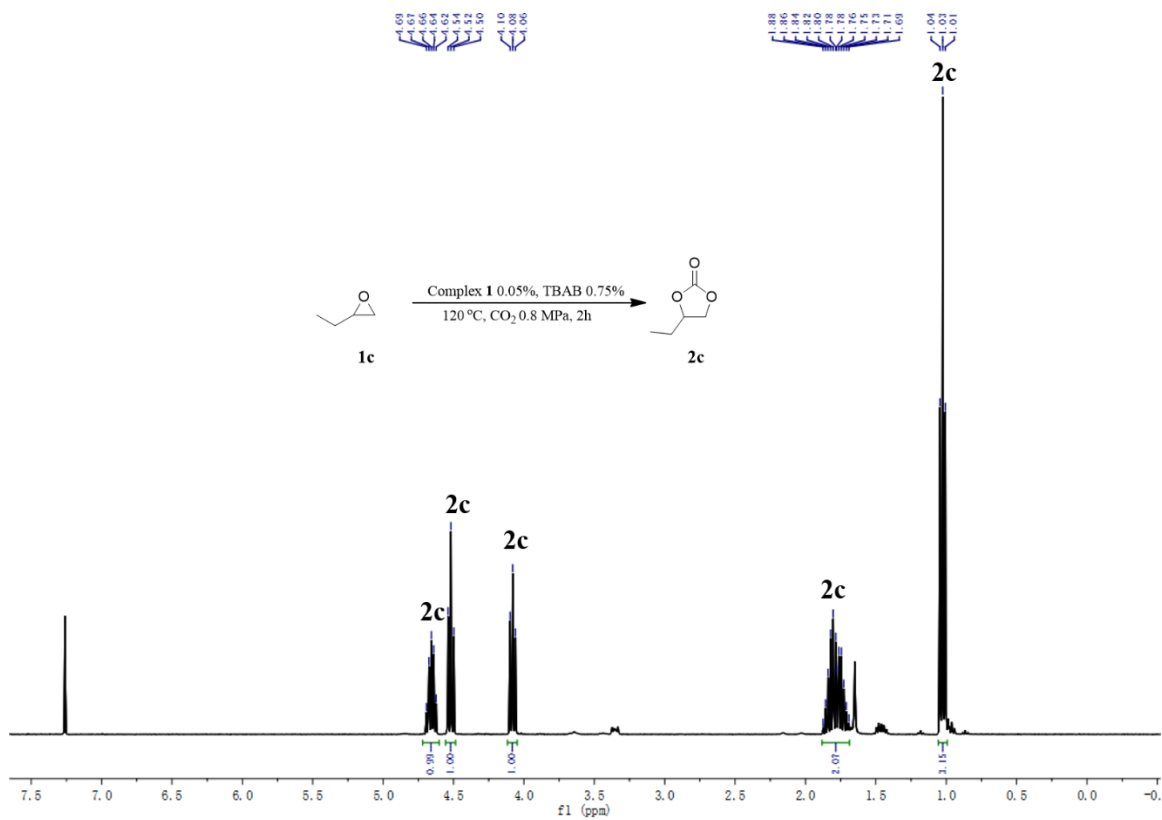

**Figure S17.** <sup>1</sup>H NMR (CDCl<sub>3</sub>) spectrum for the cycloaddition reaction of CO<sub>2</sub> and 1,2-epoxybutane catalyzed by complex **1** using 10 mmol of the substrate, 0.05 mol% of catalyst (per metal), 0.75 mol % of TBAB and 8 bar CO<sub>2</sub> at 120 °C for 2 h under solvent-free condition.

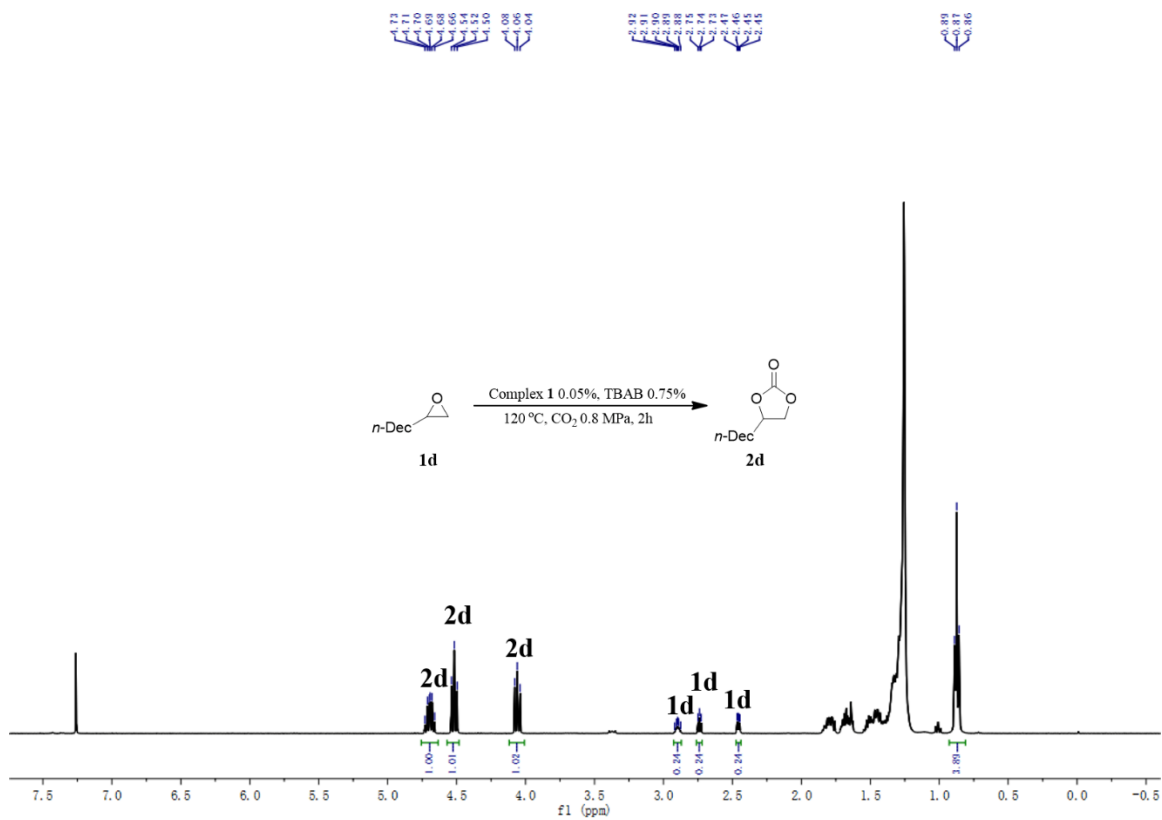

**Figure S18.** <sup>1</sup>H NMR (CDCl<sub>3</sub>) spectrum for the cycloaddition reaction of CO<sub>2</sub> and 1,2-epoxydodecane catalyzed by complex **1** using 10 mmol of the substrate, 0.05 mol% of catalyst (per metal), 0.75 mol % of TBAB and 8 bar CO<sub>2</sub> at 120 °C for 2 h under solvent-free condition.



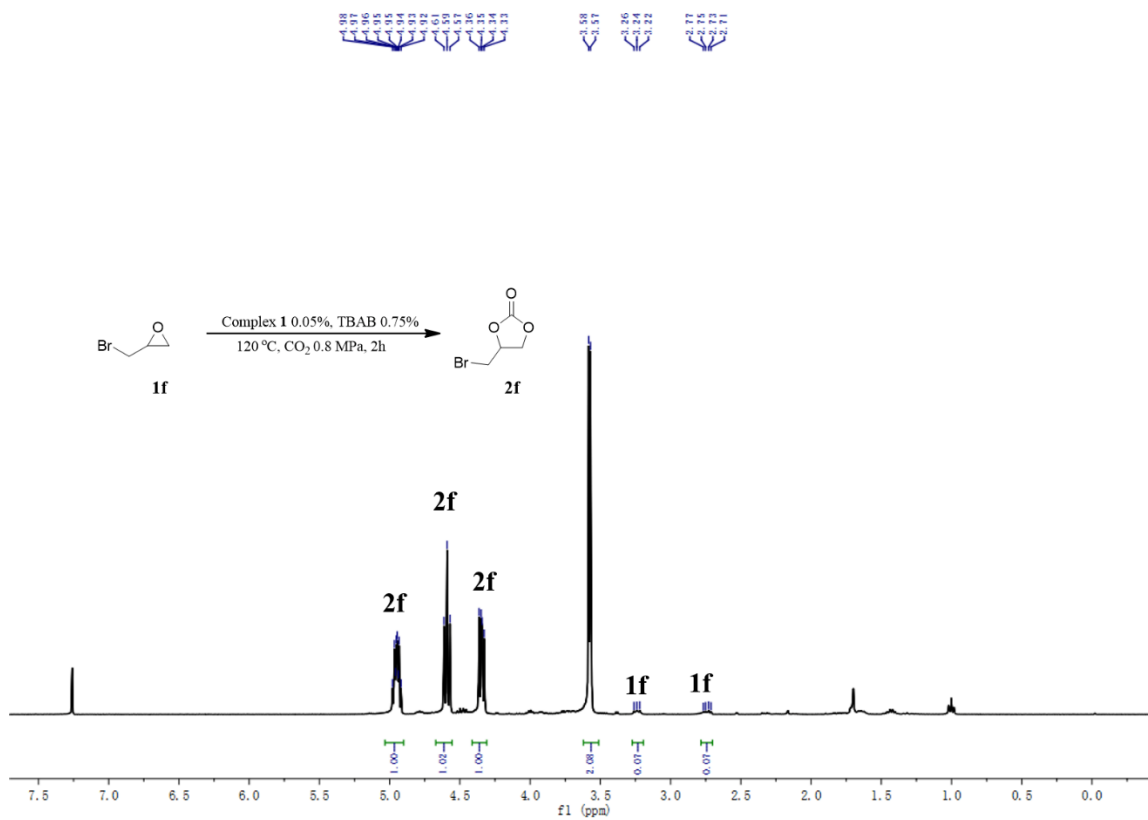

**Figure S20.** <sup>1</sup>H NMR (CDCl<sub>3</sub>) spectrum for the cycloaddition reaction of CO<sub>2</sub> and epibromohydrin catalyzed by complex **1** using 10 mmol of the substrate, 0.05 mol% of catalyst (per metal), 0.75 mol % of TBAB and 8 bar CO<sub>2</sub> at 120 °C for 2 h under solvent-free condition.



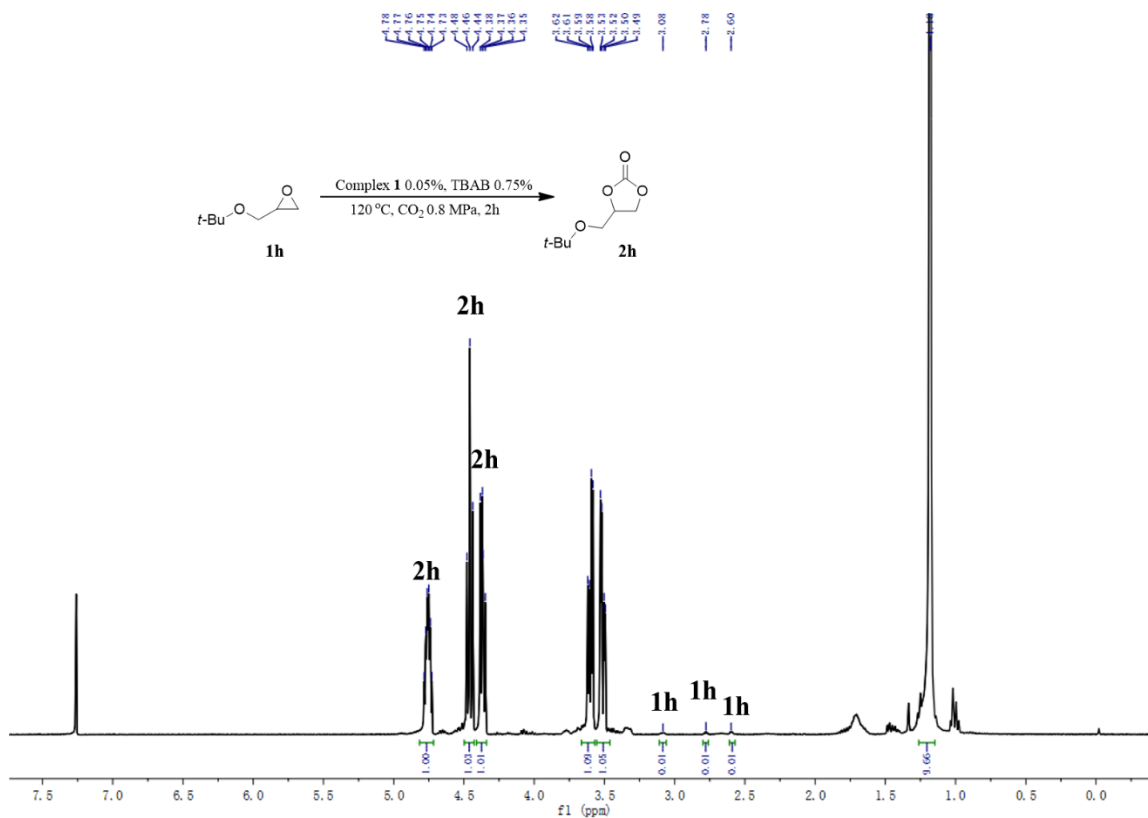

**Figure S22.** <sup>1</sup>H NMR (CDCl<sub>3</sub>) spectrum for the cycloaddition reaction of CO<sub>2</sub> and *tert*-butyl glycidyl ether catalyzed by complex **1** using 10 mmol of the substrate, 0.05 mol% of catalyst (per metal), 0.75 mol % of TBAB and 8 bar CO<sub>2</sub> at 120 °C for 2 h under solvent-free condition.

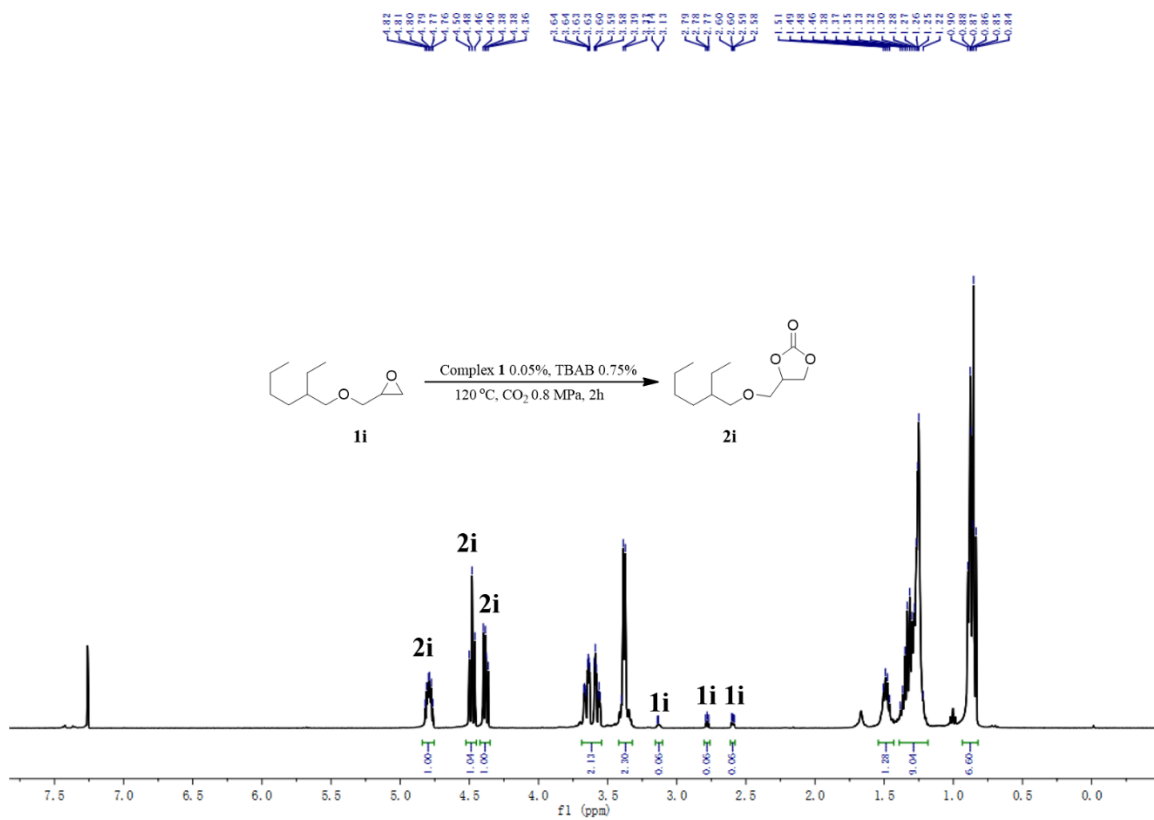

**Figure S23.** <sup>1</sup>H NMR (CDCl<sub>3</sub>) spectrum for the cycloaddition reaction of CO<sub>2</sub> and 2-ethylhexyl glycidyl ether catalyzed by complex **1** using 10 mmol of the substrate, 0.05 mol% of catalyst (per metal), 0.75 mol % of TBAB and 8 bar CO<sub>2</sub> at 120 °C for 2 h under solvent-free condition.

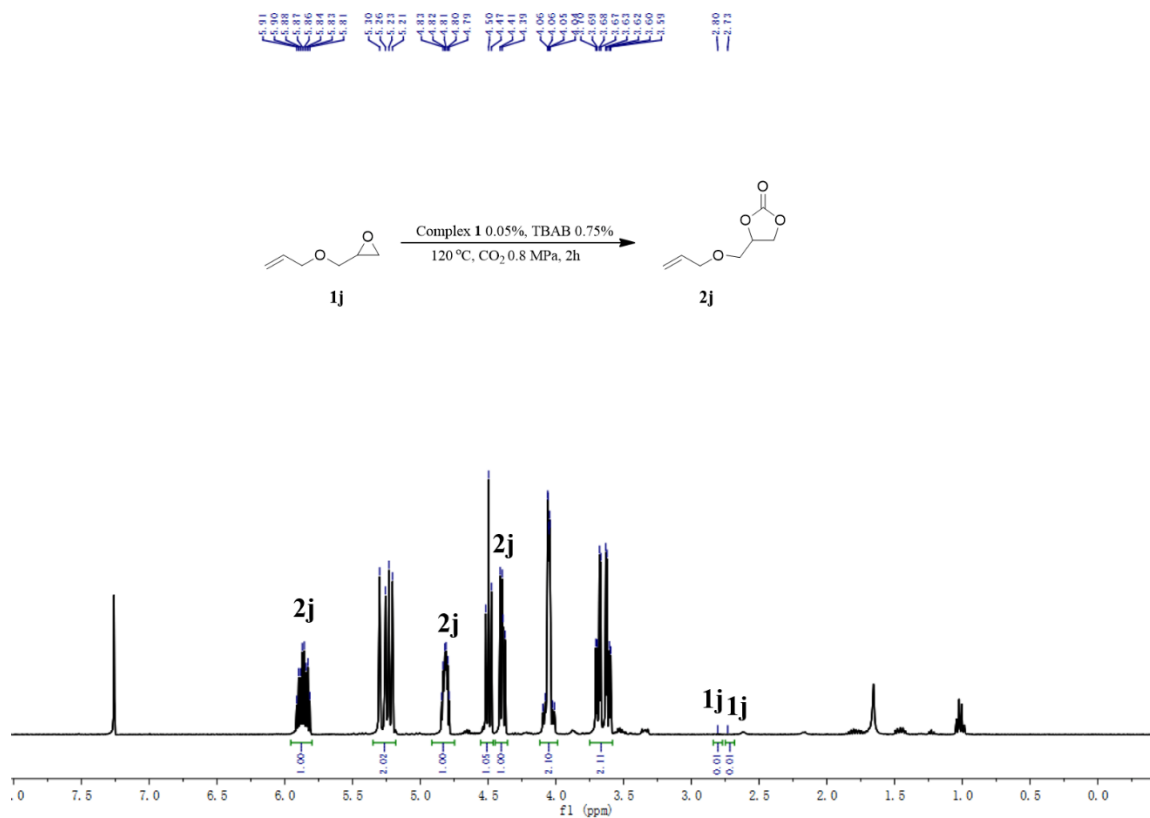

**Figure S24.**  $^1\text{H}$  NMR ( $\text{CDCl}_3$ ) spectrum for the cycloaddition reaction of  $\text{CO}_2$  and allyl glycidyl ether catalyzed by complex **1** using 10 mmol of the substrate, 0.05 mol% of catalyst (per metal), 0.75 mol % of TBAB and 8 bar  $\text{CO}_2$  at 120 °C for 2 h under solvent-free condition.



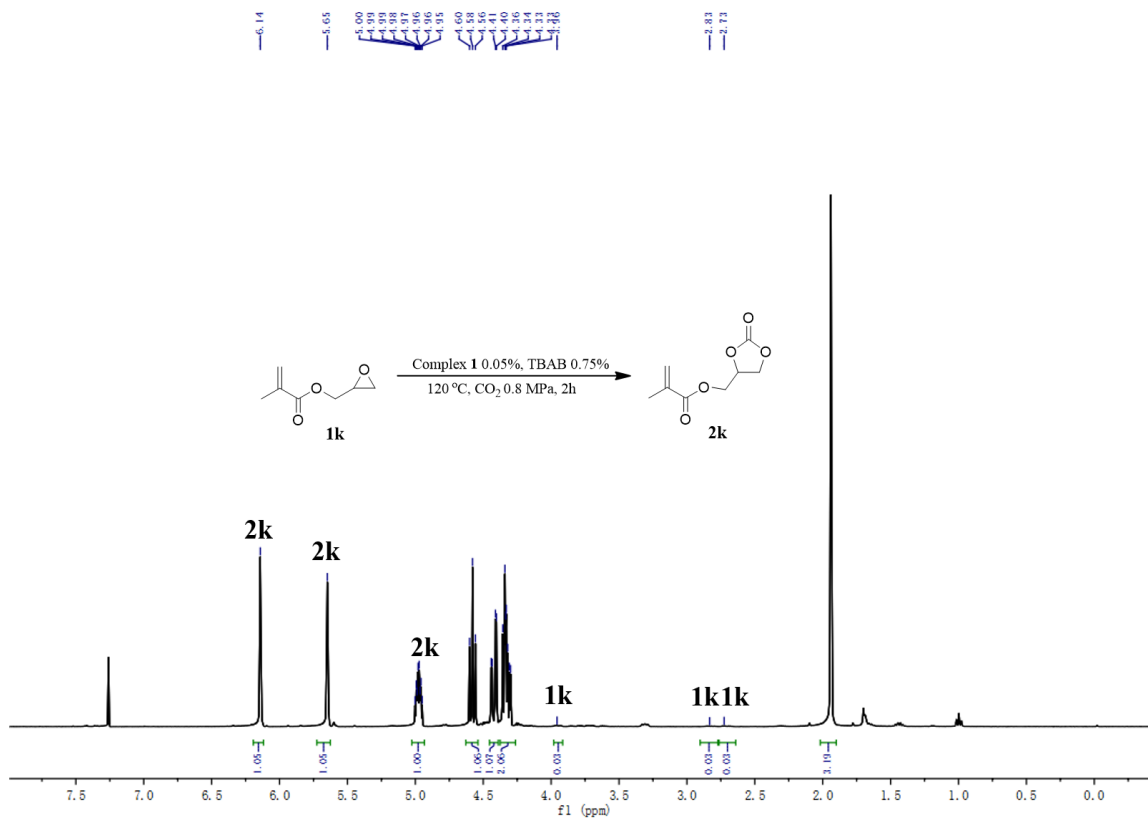

**Figure S25.** <sup>1</sup>H NMR (CDCl<sub>3</sub>) spectrum for the cycloaddition reaction of CO<sub>2</sub> and glycidyl methacrylate catalyzed by complex **1** using 10 mmol of the substrate, 0.05 mol% of catalyst (per metal), 0.75 mol % of TBAB and 8 bar CO<sub>2</sub> at 120 °C for 2 h under solvent-free condition.

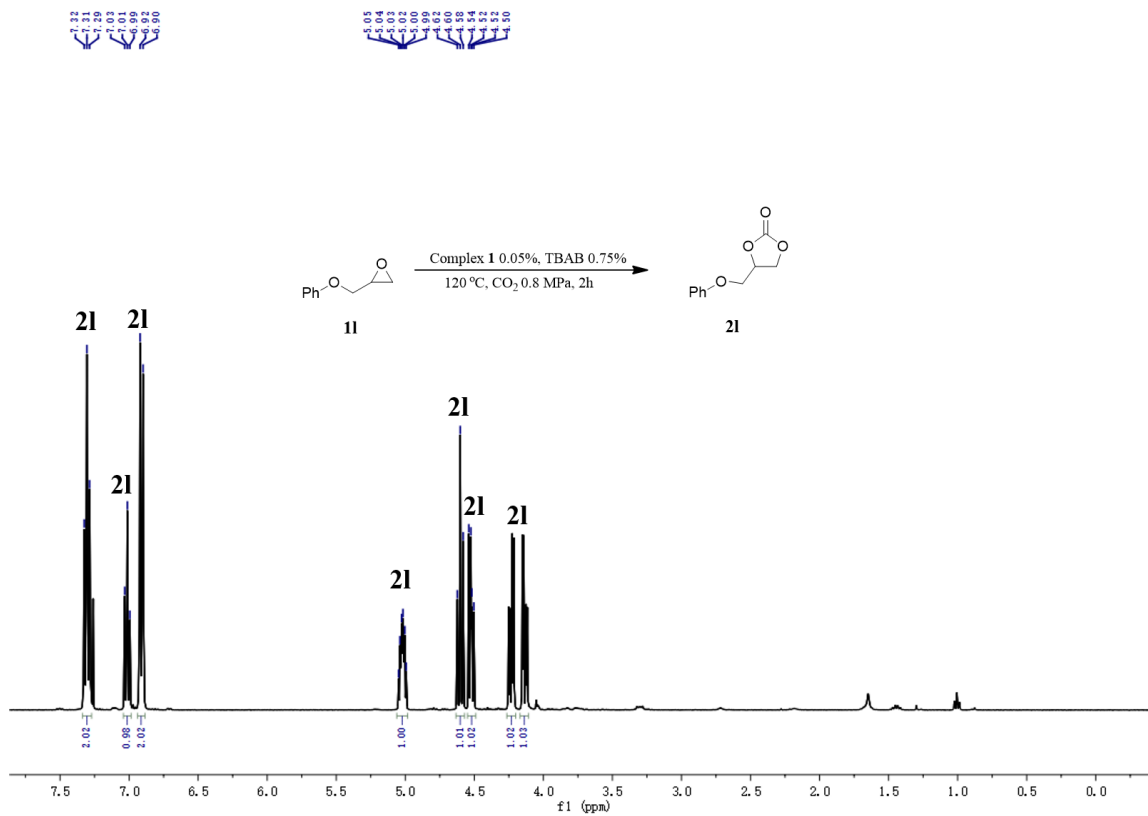

**Figure S26.** <sup>1</sup>H NMR (CDCl<sub>3</sub>) spectrum for the cycloaddition reaction of CO<sub>2</sub> and glycidyl phenyl ether catalyzed by complex **1** using 10 mmol of the substrate, 0.05 mol% of catalyst (per metal), 0.75 mol % of TBAB and 8 bar CO<sub>2</sub> at 120 °C for 2 h under solvent-free condition.

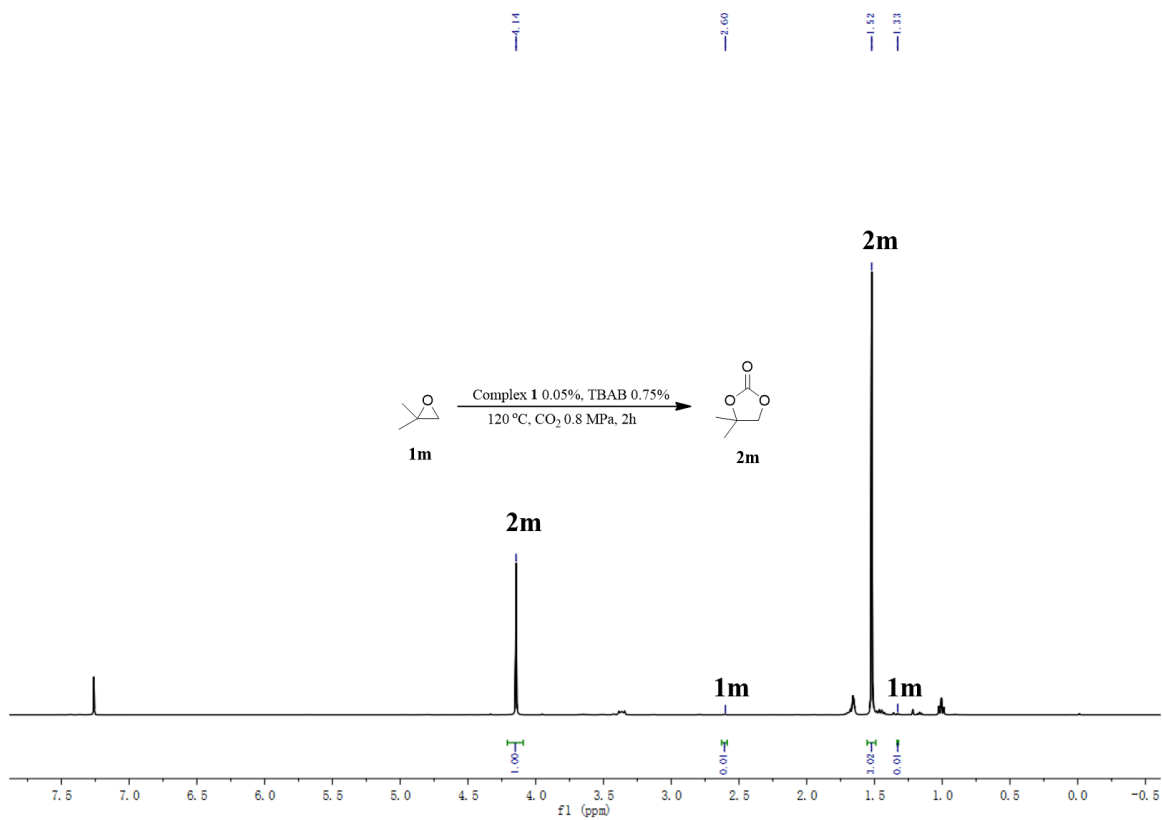

**Figure S27.** <sup>1</sup>H NMR (CDCl<sub>3</sub>) spectrum for the cycloaddition reaction of CO<sub>2</sub> and isobutylene oxide catalyzed by complex **1** using 10 mmol of the substrate, 0.05 mol% of catalyst (per metal), 0.75 mol % of TBAB and 8 bar CO<sub>2</sub> at 120 °C for 2 h under solvent-free condition.

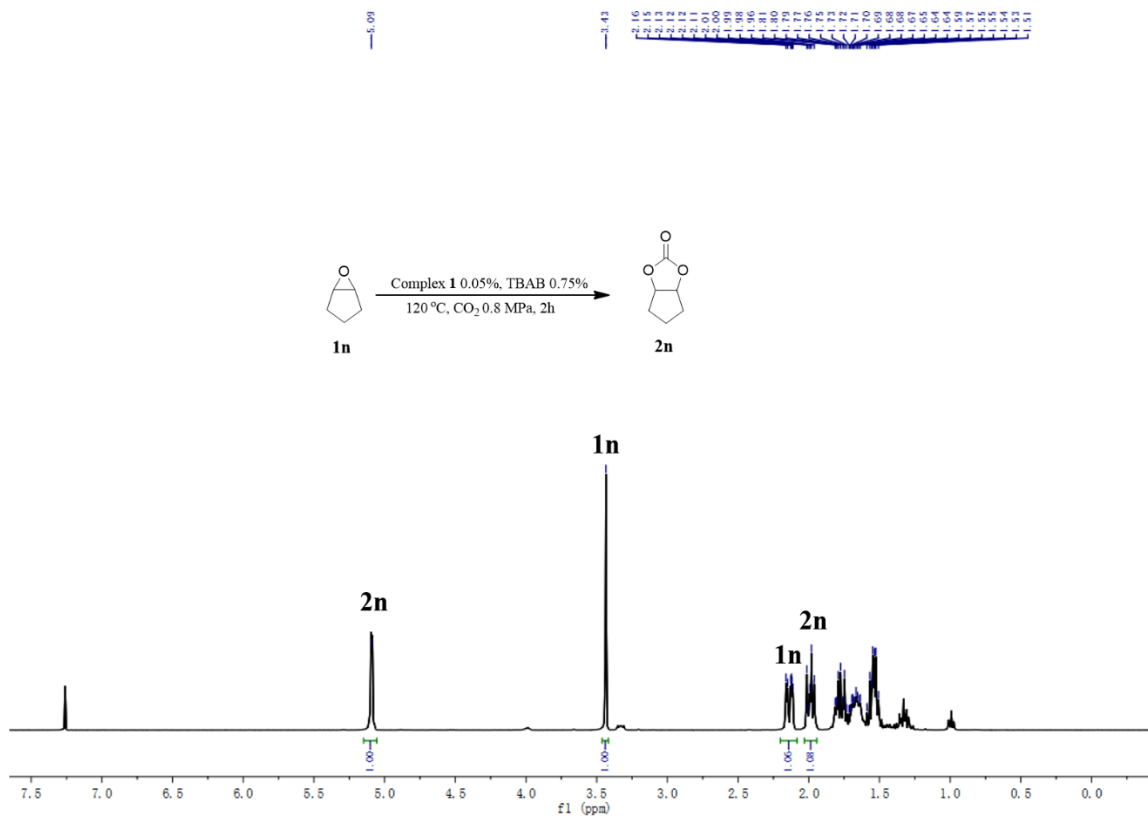

**Figure S28.** <sup>1</sup>H NMR (CDCl<sub>3</sub>) spectrum for the cycloaddition reaction of CO<sub>2</sub> and cyclopentene oxide catalyzed by complex **1** using 10 mmol of the substrate, 0.05 mol% of catalyst (per metal), 0.75 mol % of TBAB and 8 bar CO<sub>2</sub> at 120 °C for 2 h under solvent-free condition.

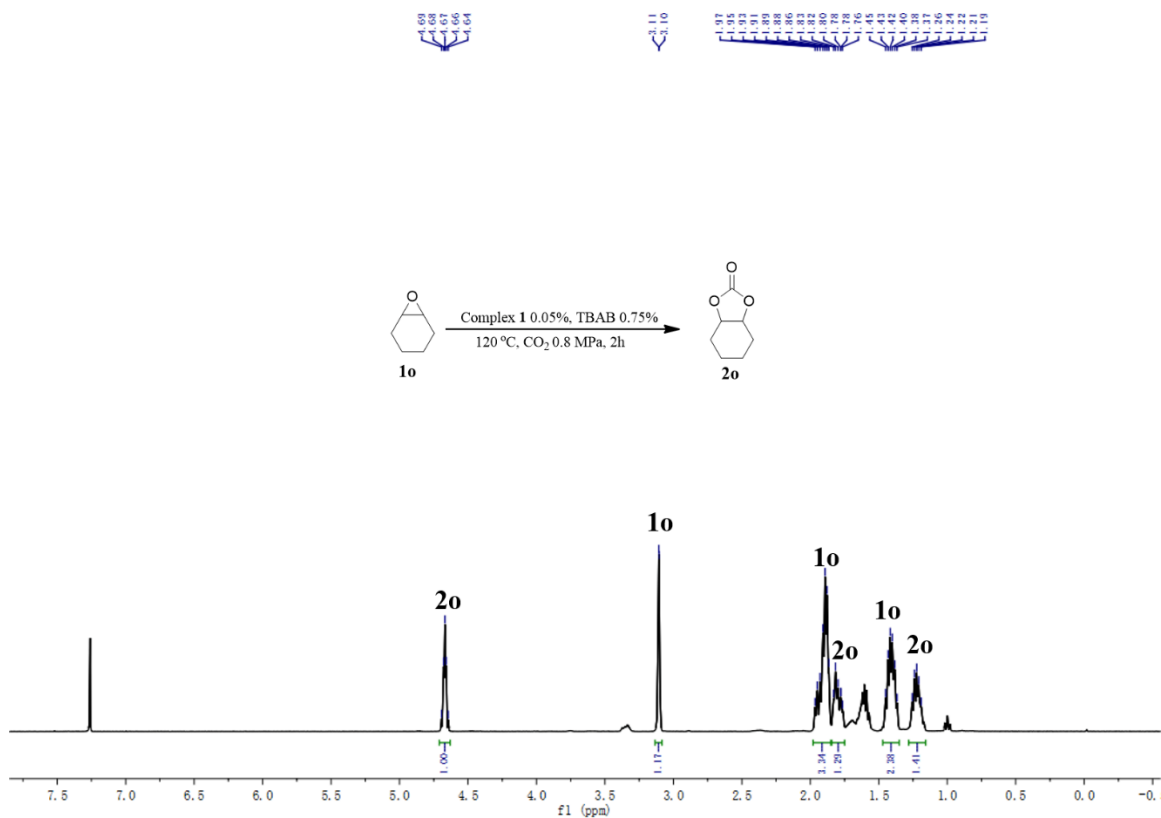

**Figure S29.** <sup>1</sup>H NMR (CDCl<sub>3</sub>) spectrum for the cycloaddition reaction of CO<sub>2</sub> and cyclohexene oxide catalyzed by complex **1** using 10 mmol of the substrate, 0.05 mol% of catalyst (per metal), 0.75 mol % of TBAB and 8 bar CO<sub>2</sub> at 120 °C for 2 h under solvent-free condition.

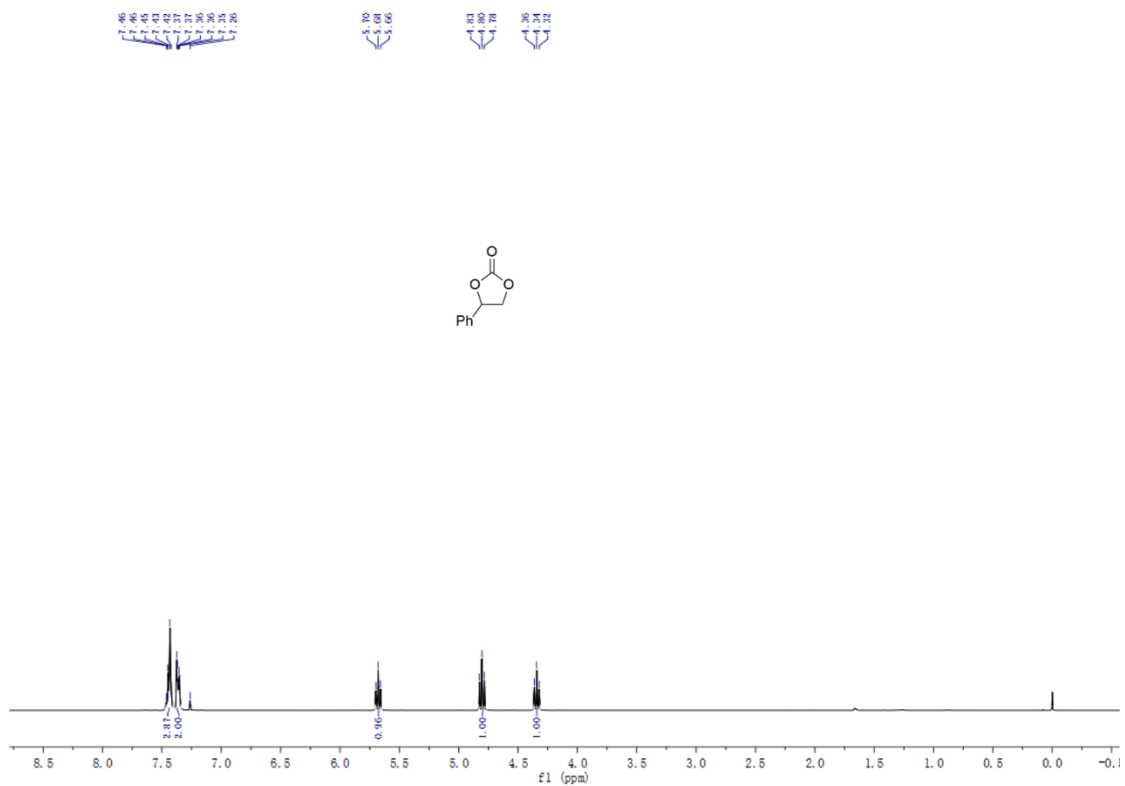

Figure S30.  $^1\text{H NMR}$  (CDCl<sub>3</sub>) spectrum for (2a).

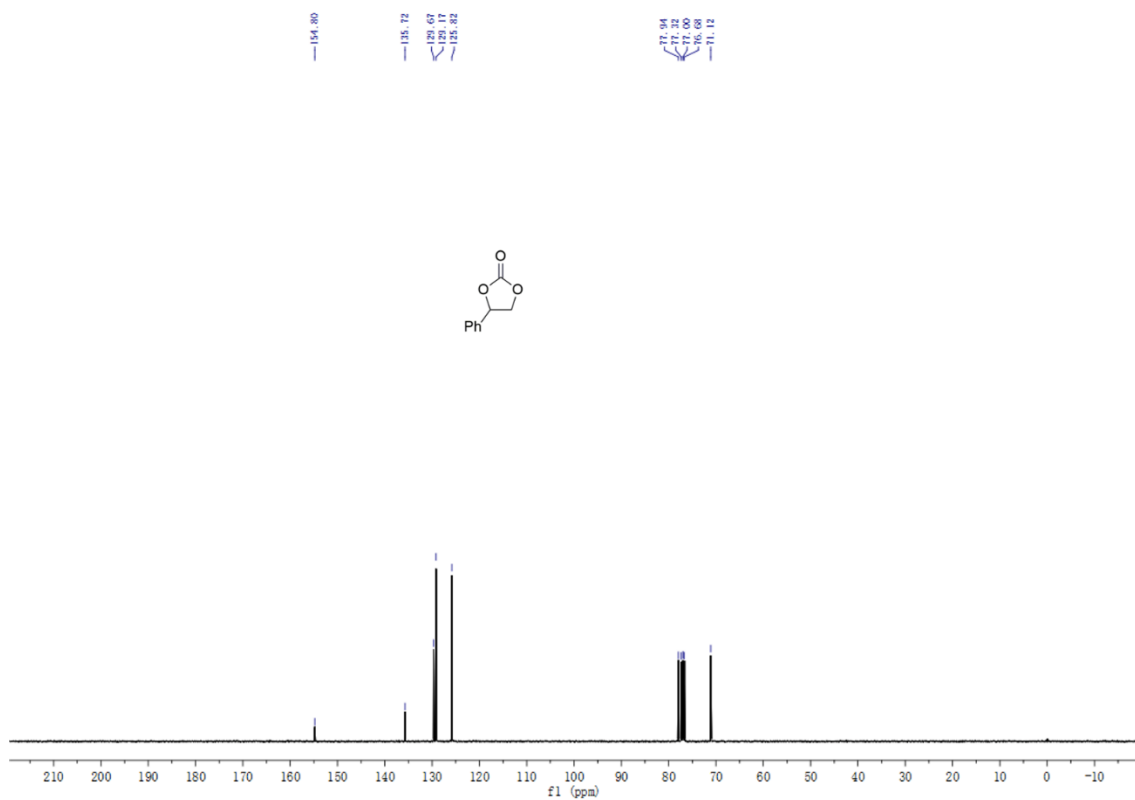

Figure S31.  $^{13}\text{C NMR}$  (CDCl<sub>3</sub>) spectrum for (2a).

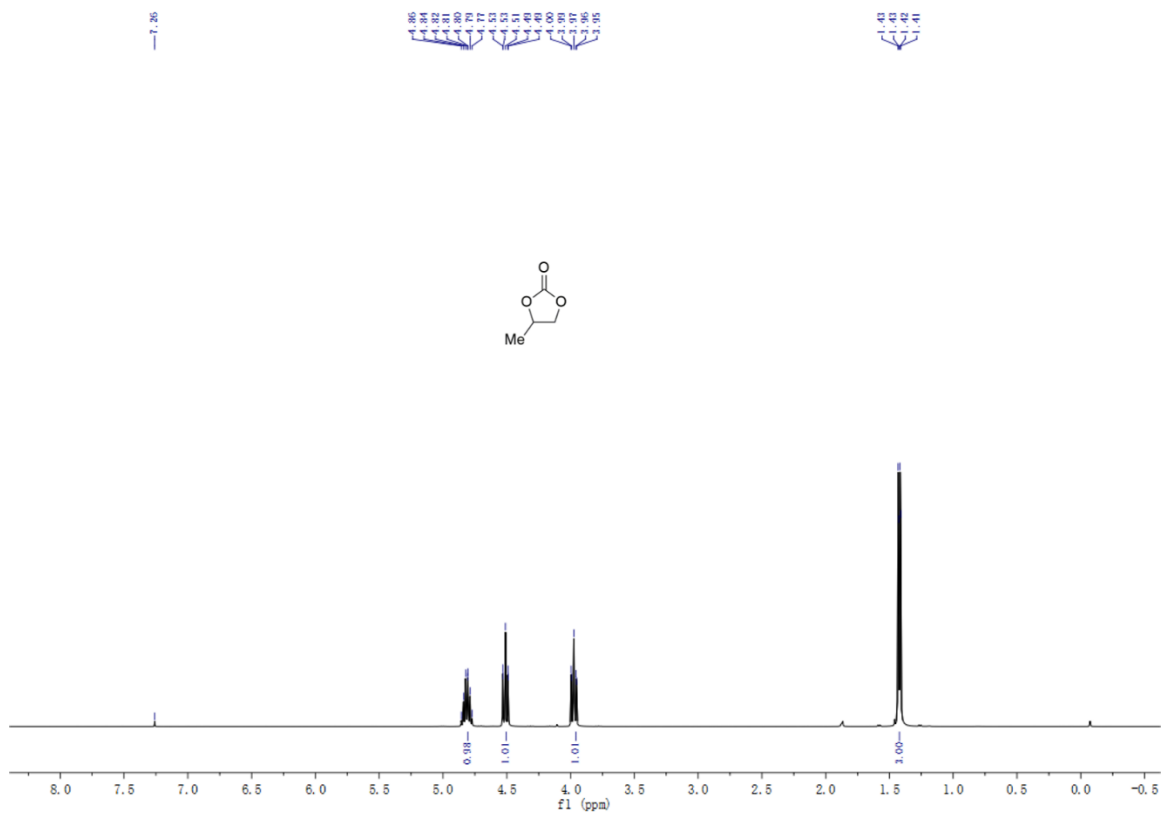

**Figure S32.**  $^1\text{H NMR}$  (CDCl<sub>3</sub>) spectrum for (2b).

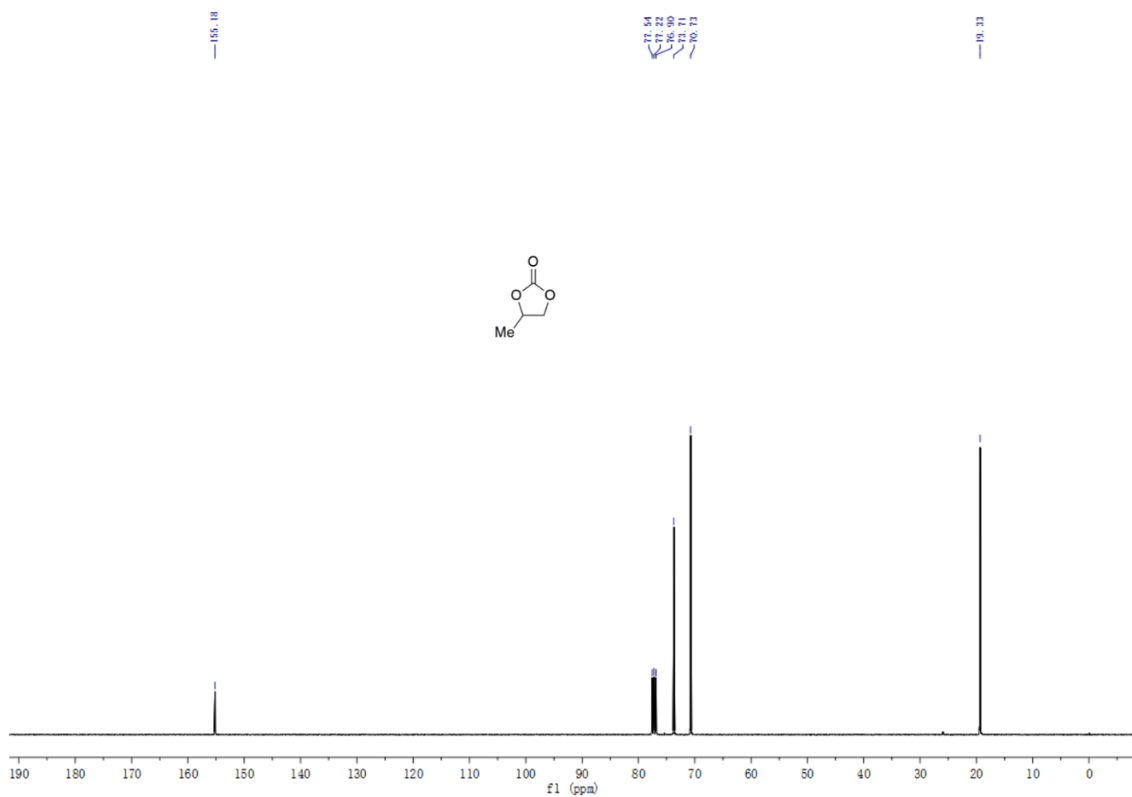

**Figure S33.**  $^{13}\text{C NMR}$  (CDCl<sub>3</sub>) spectrum for (2b).

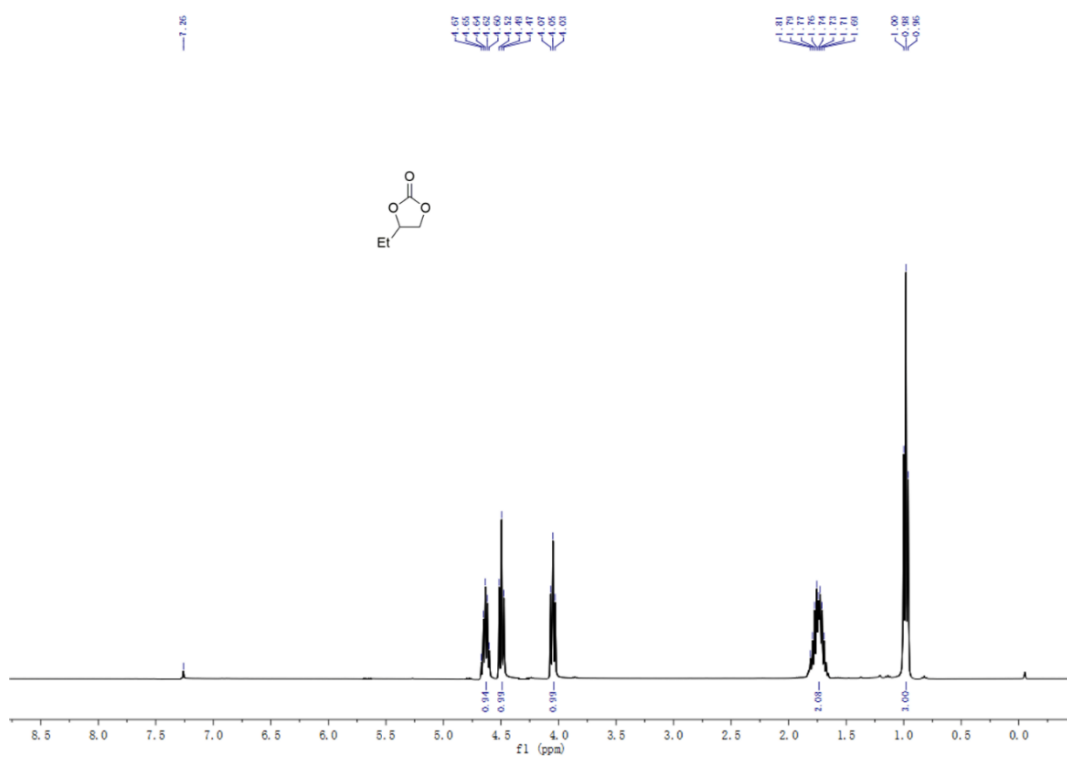

Figure S34. <sup>1</sup>H NMR (CDCl<sub>3</sub>) spectrum for (2c).

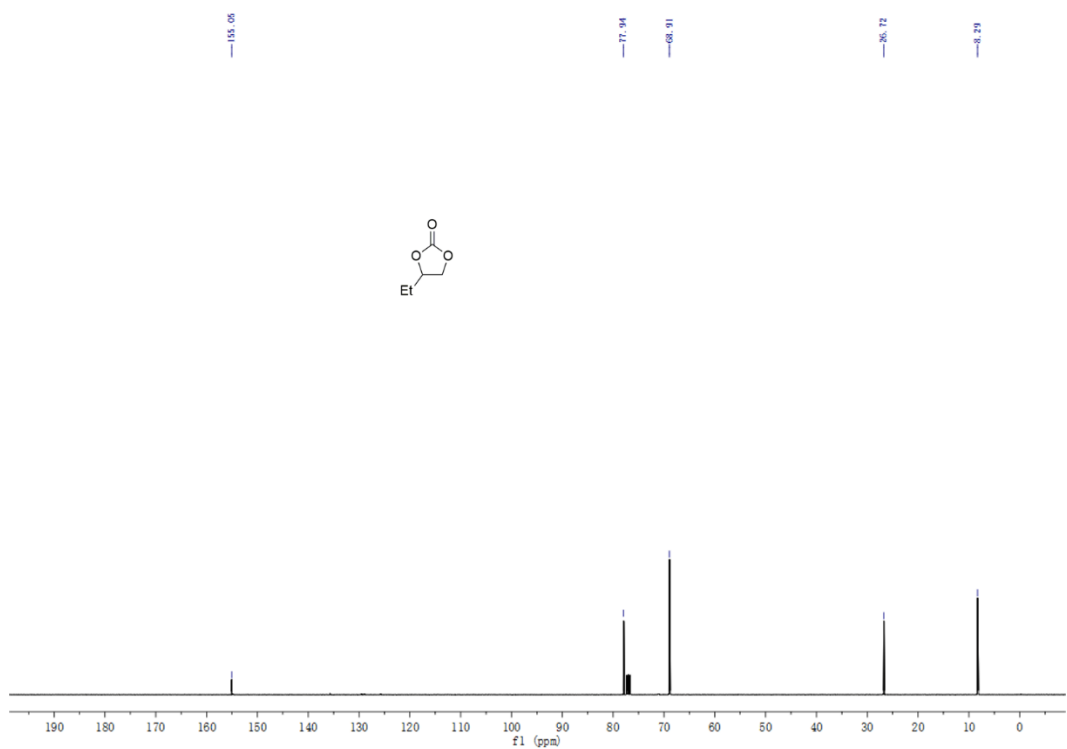

Figure S35. <sup>13</sup>C NMR (CDCl<sub>3</sub>) spectrum for (2c).



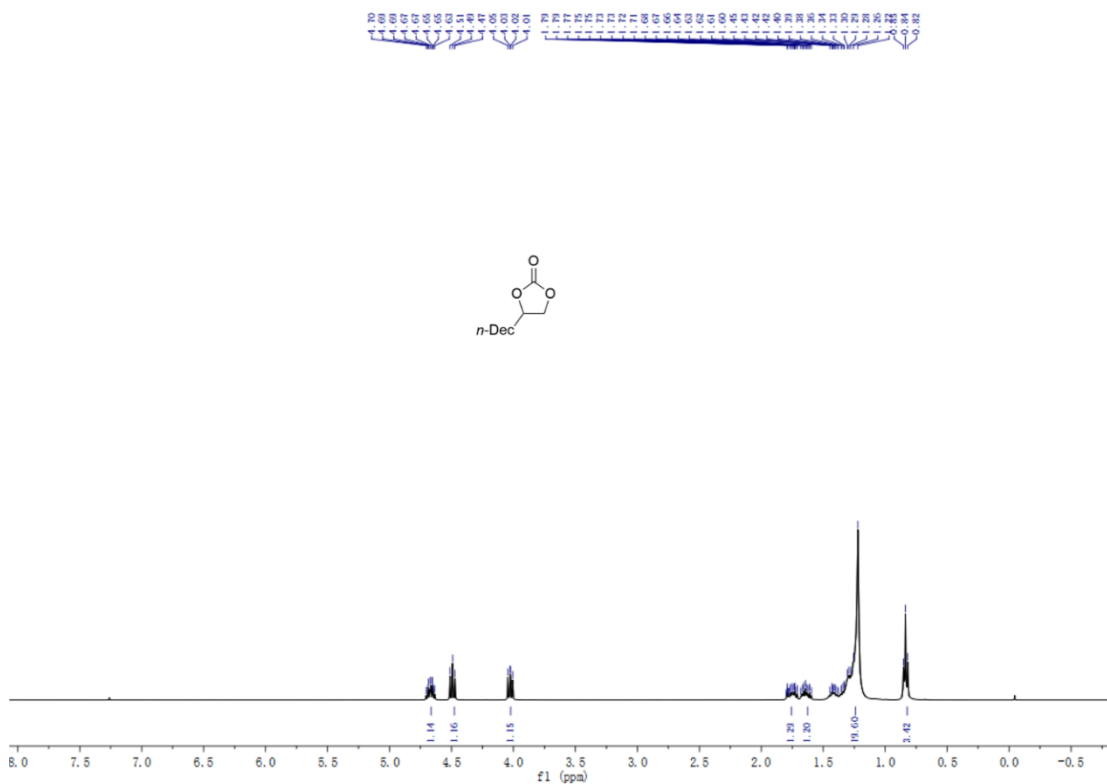

**Figure S36.** <sup>1</sup>H NMR (CDCl<sub>3</sub>) spectrum for (2d).

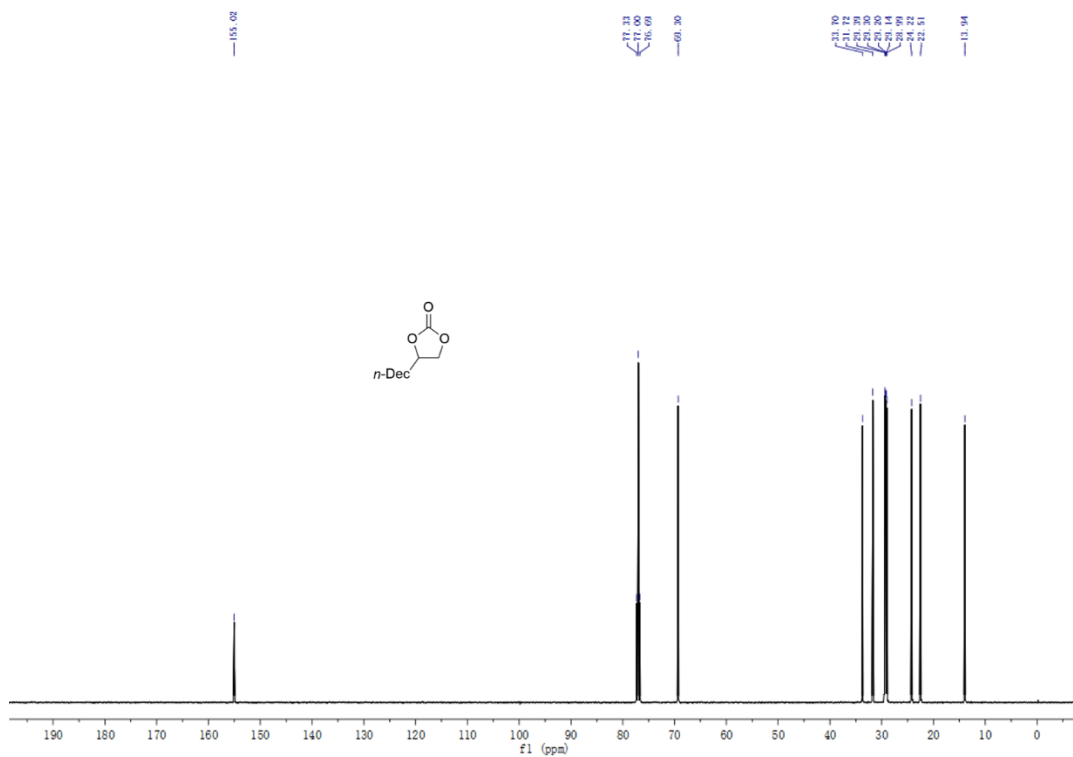

**Figure S37.** <sup>13</sup>C NMR (CDCl<sub>3</sub>) spectrum for (2d).

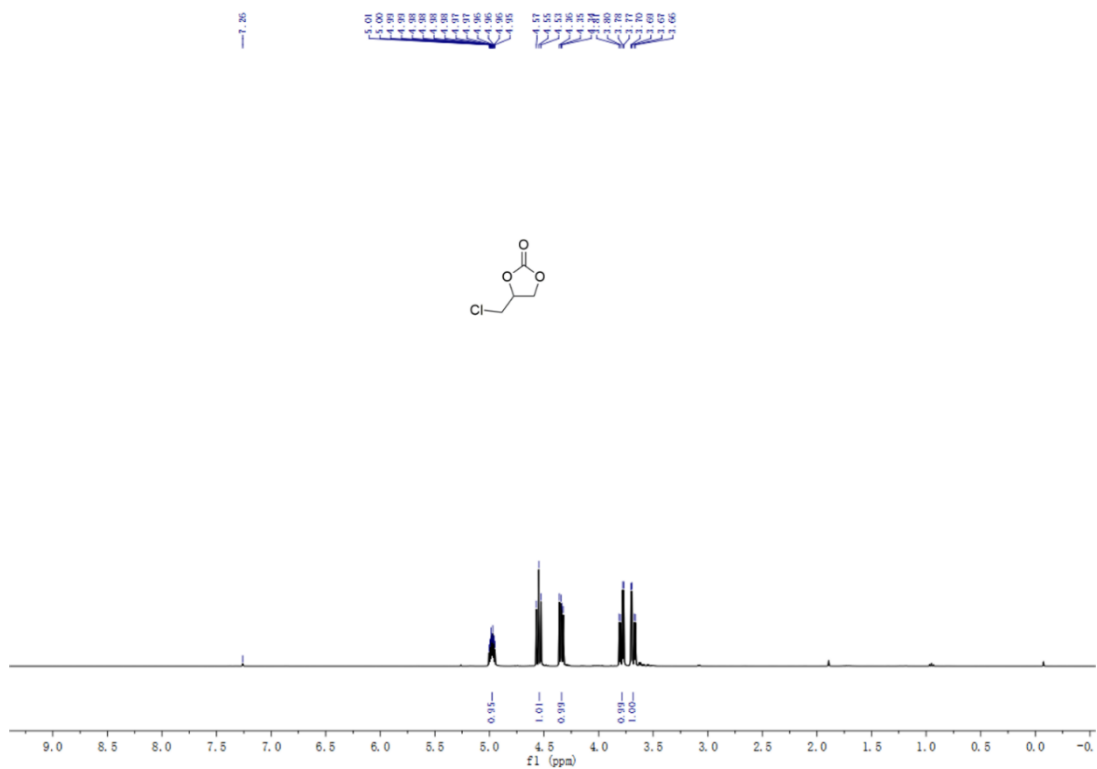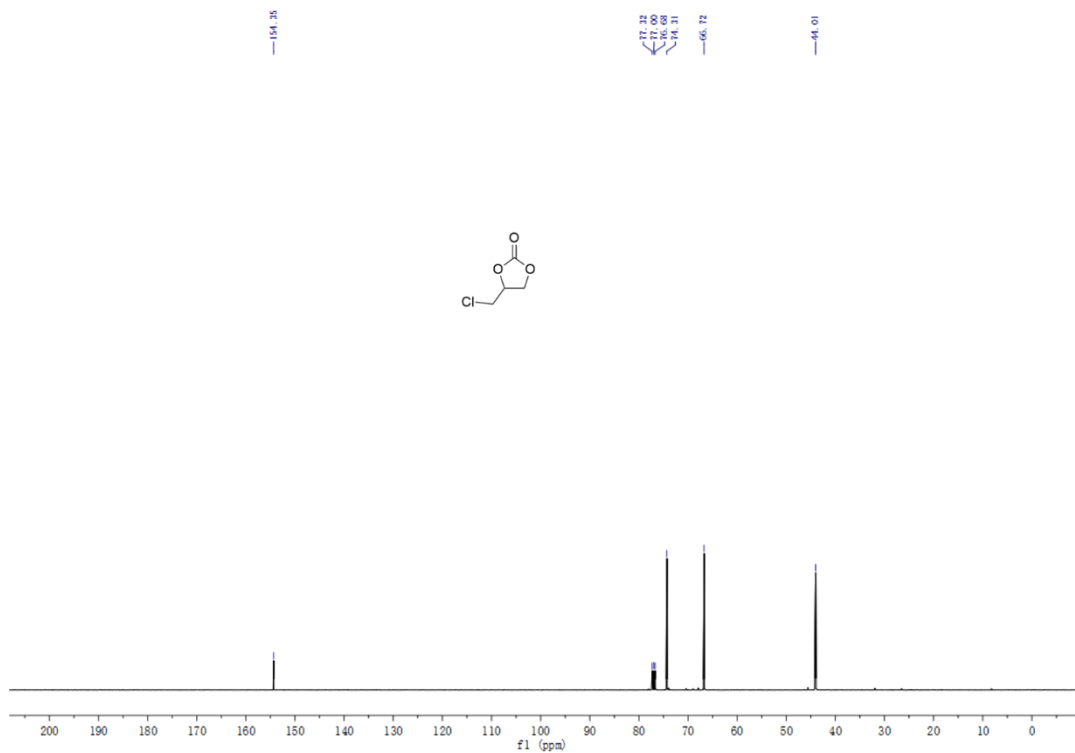



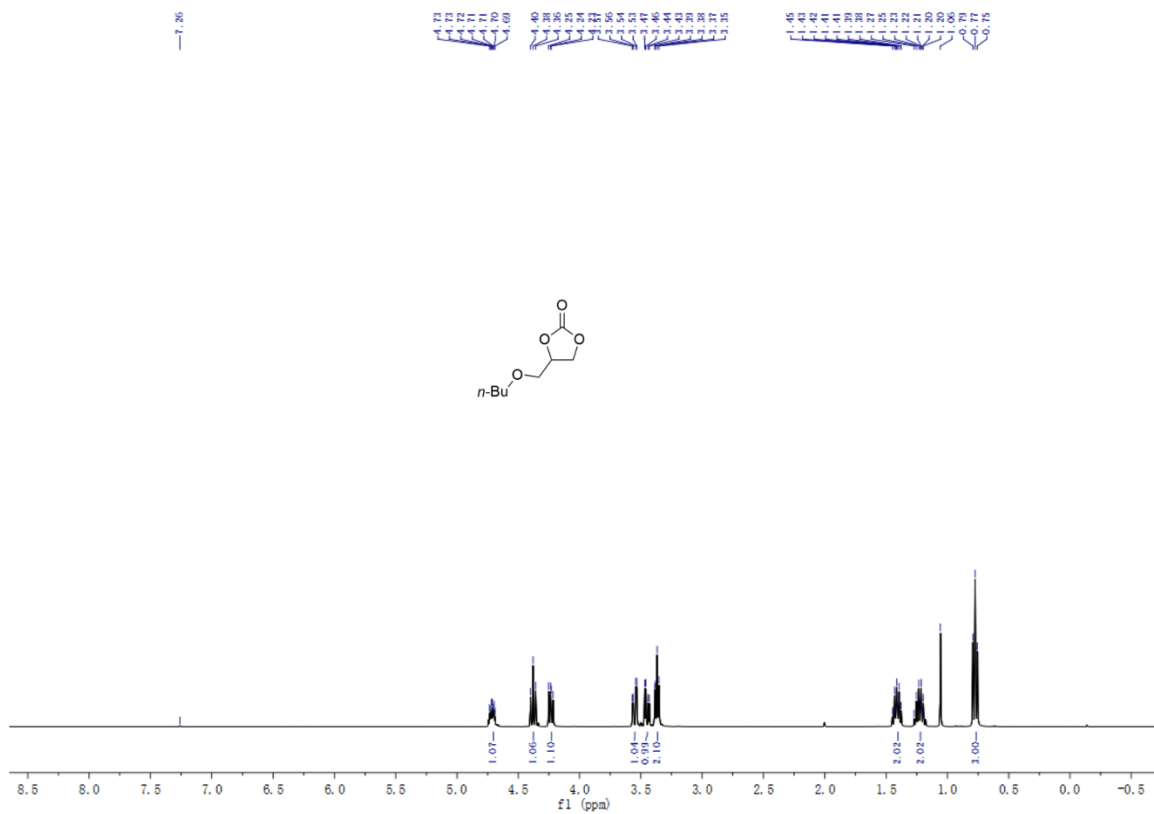

Figure S42.  $^1\text{H}$  NMR ( $\text{CDCl}_3$ ) spectrum for (2g).

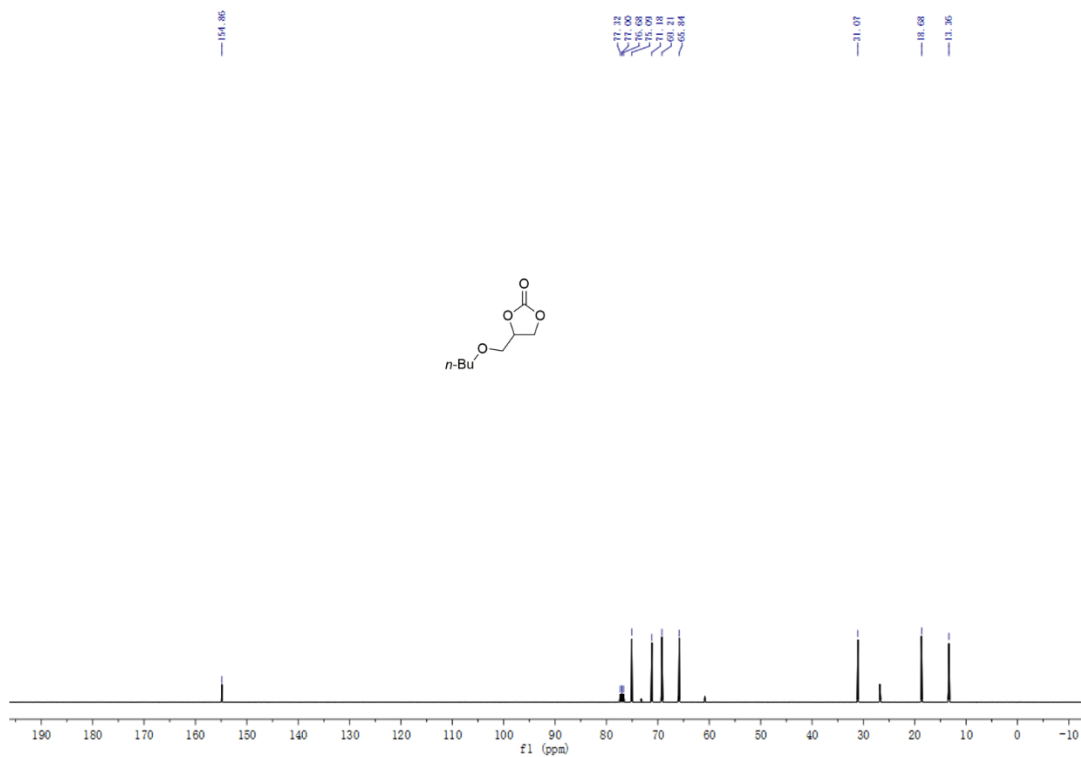

Figure S43.  $^{13}\text{C}$  NMR ( $\text{CDCl}_3$ ) spectrum for (2g).

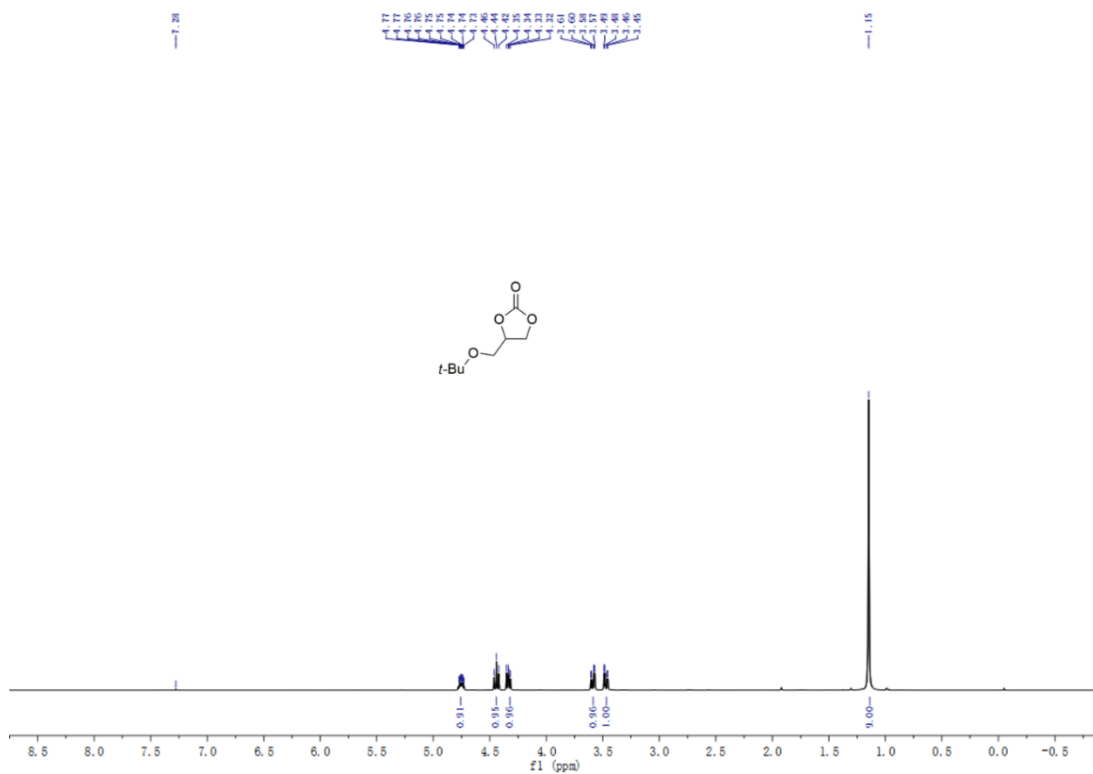

Figure S44.  $^1\text{H}$  NMR ( $\text{CDCl}_3$ ) spectrum for (2h).

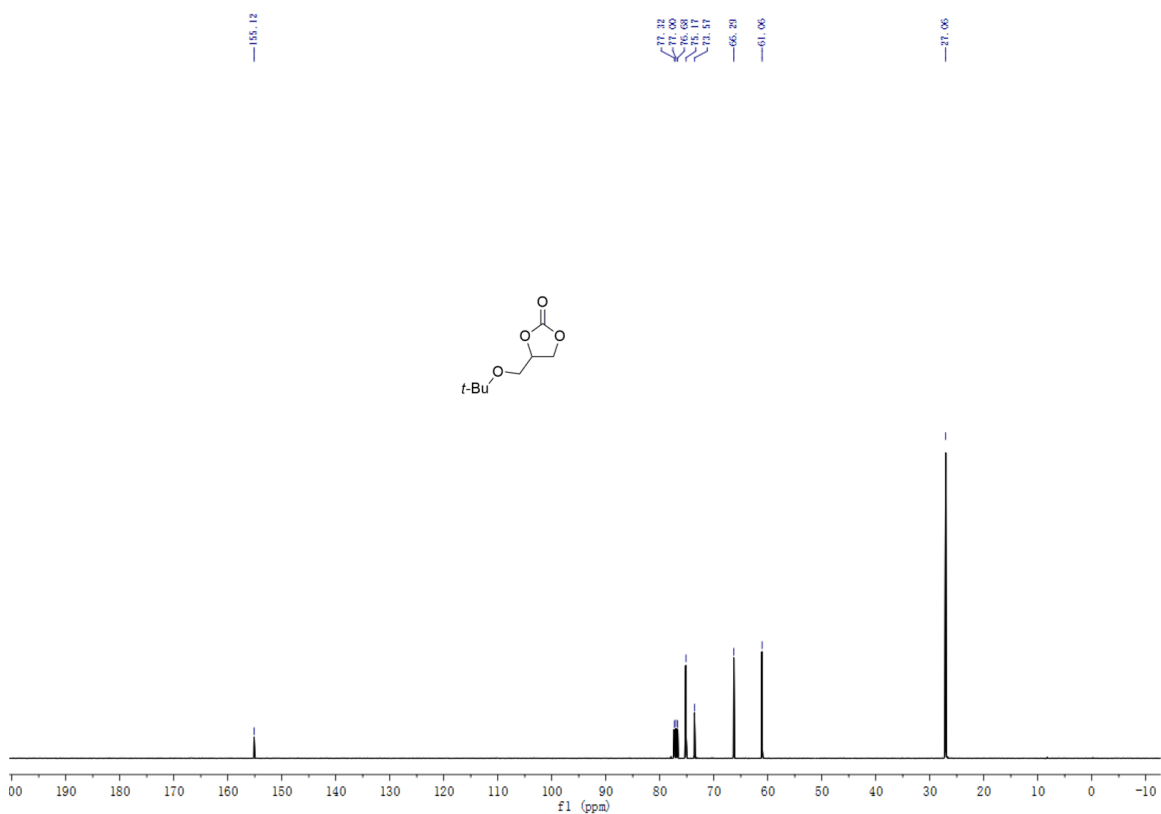

Figure S45.  $^{13}\text{C}$  NMR ( $\text{CDCl}_3$ ) spectrum for (2h).



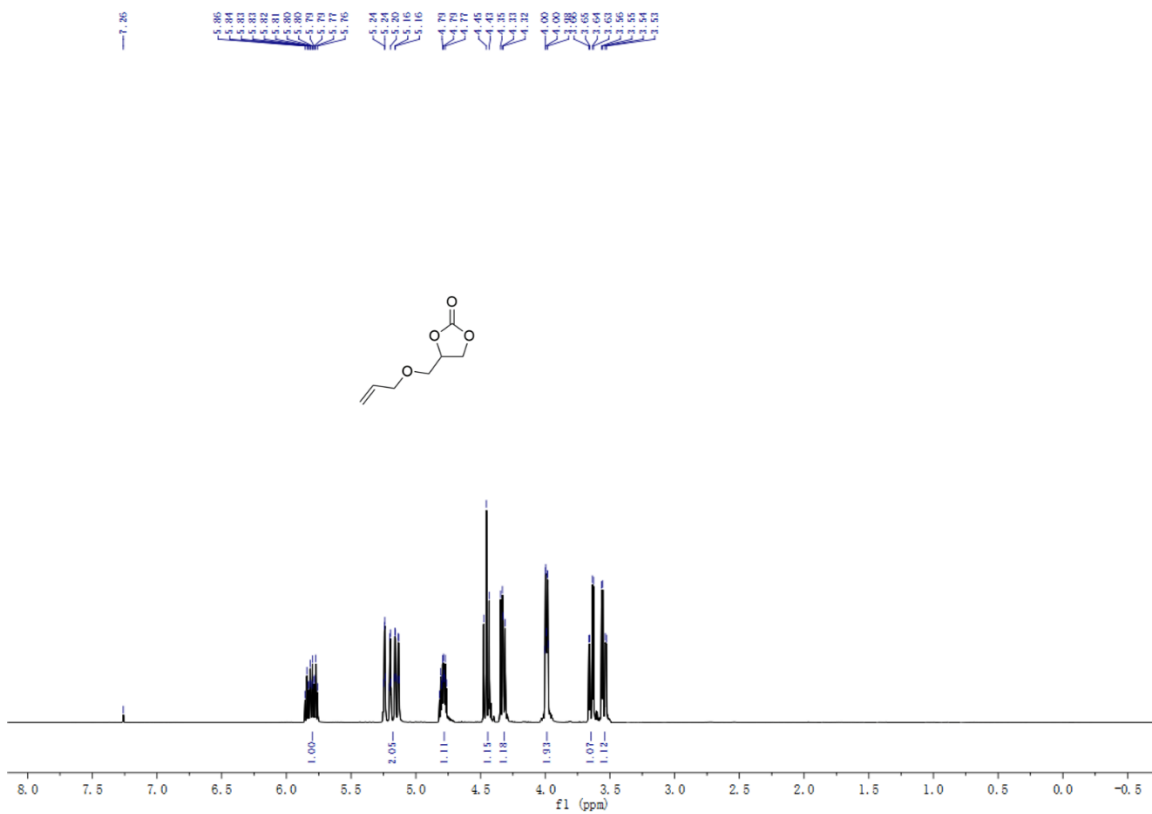

Figure S48.  $^1\text{H}$  NMR ( $\text{CDCl}_3$ ) spectrum for (2j).

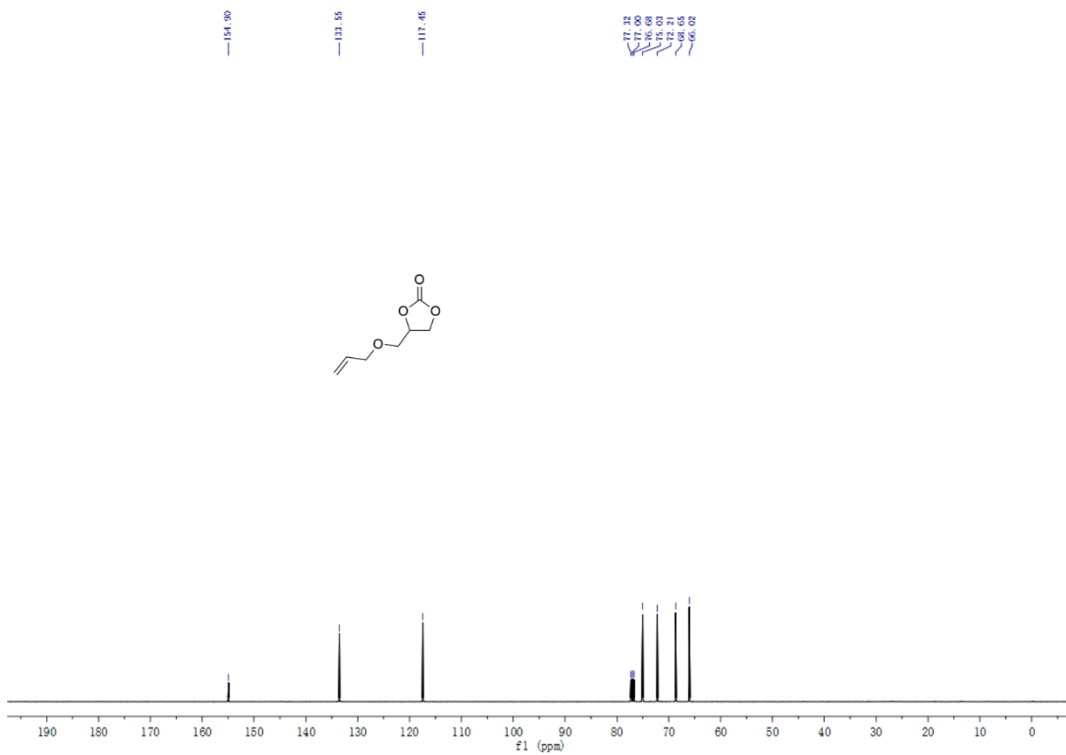

Figure S49.  $^{13}\text{C}$  NMR ( $\text{CDCl}_3$ ) spectrum for (2j).

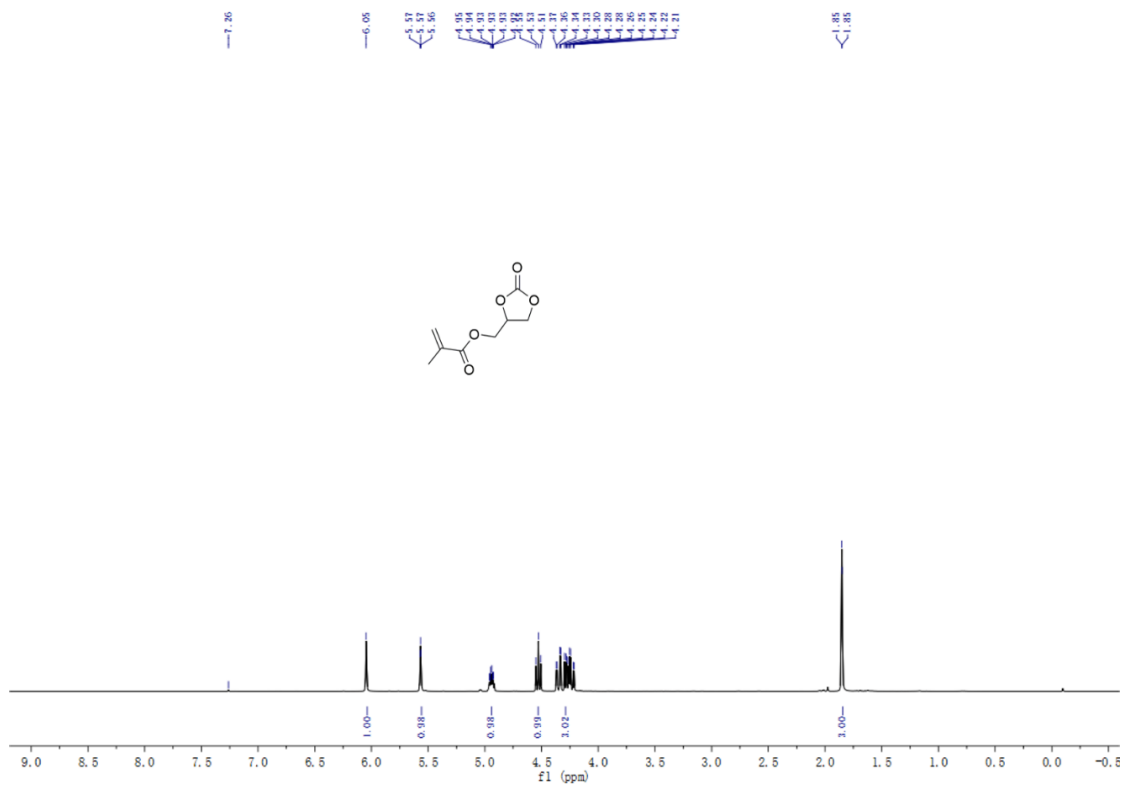

Figure S50.  $^1\text{H}$  NMR (CDCl<sub>3</sub>) spectrum for (2k).

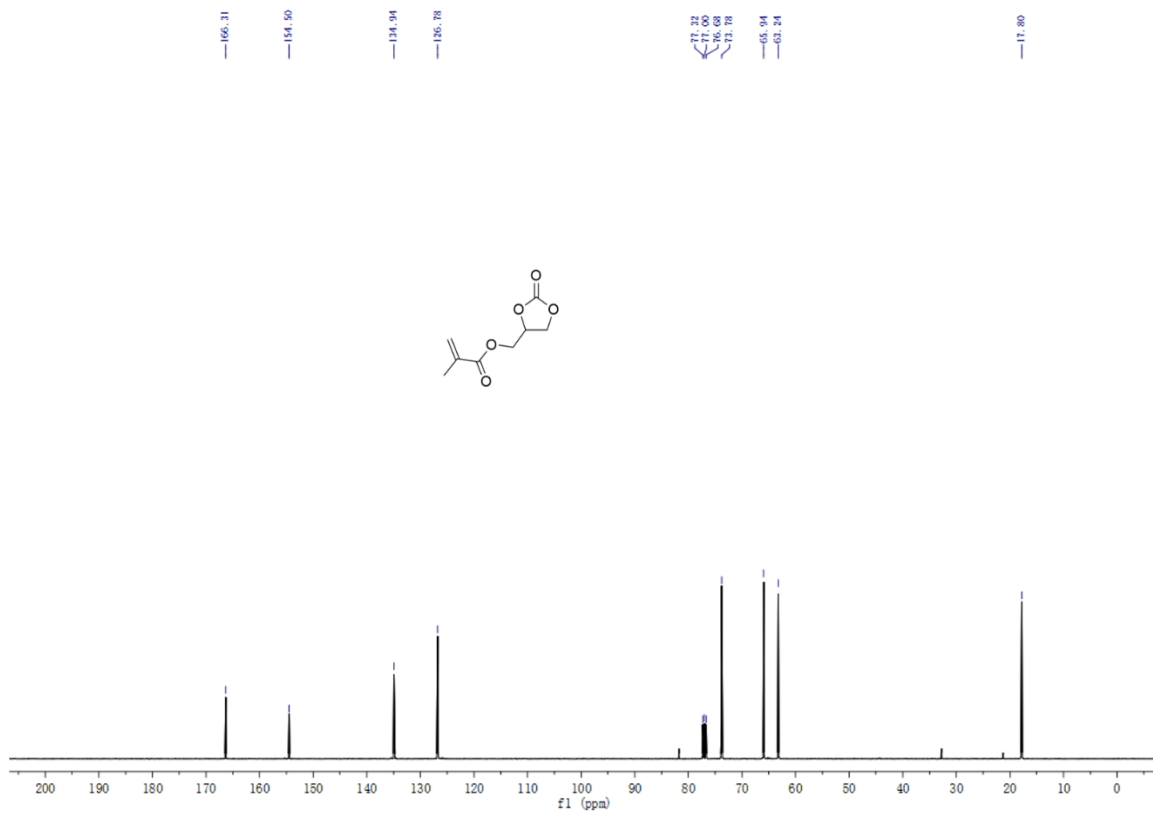

Figure S51.  $^{13}\text{C}$  NMR (CDCl<sub>3</sub>) spectrum for 2k



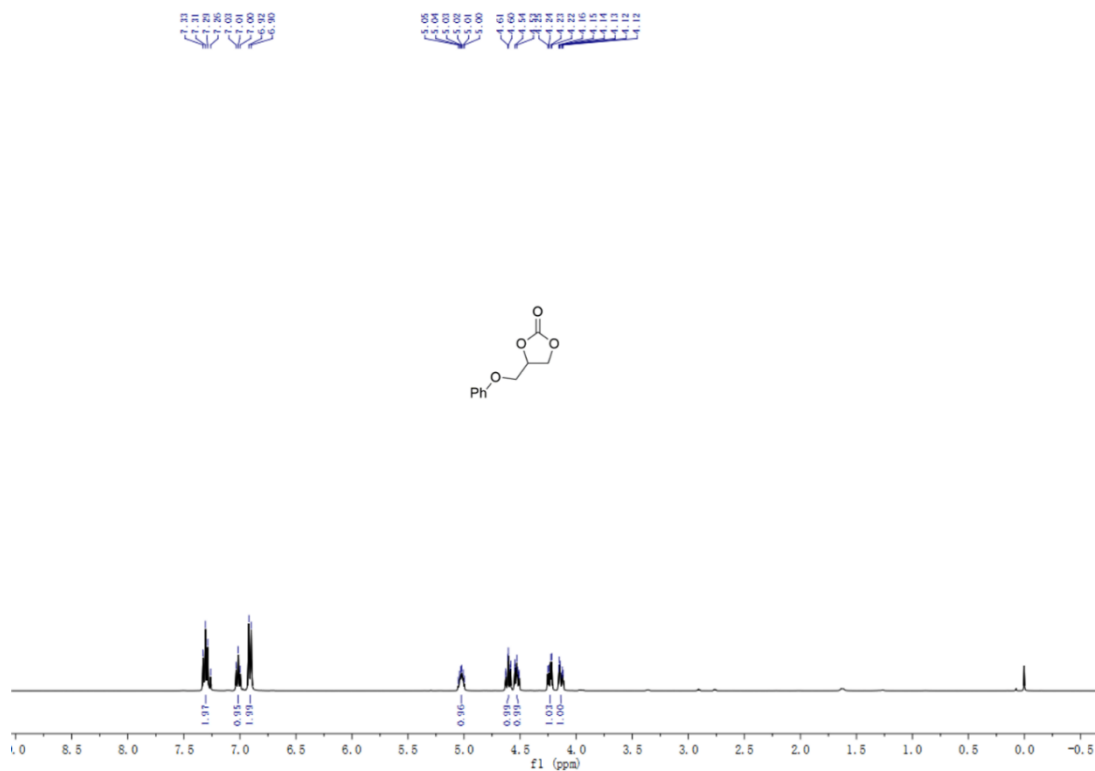

Figure S52. <sup>1</sup>H NMR (CDCl<sub>3</sub>) spectrum for (21).

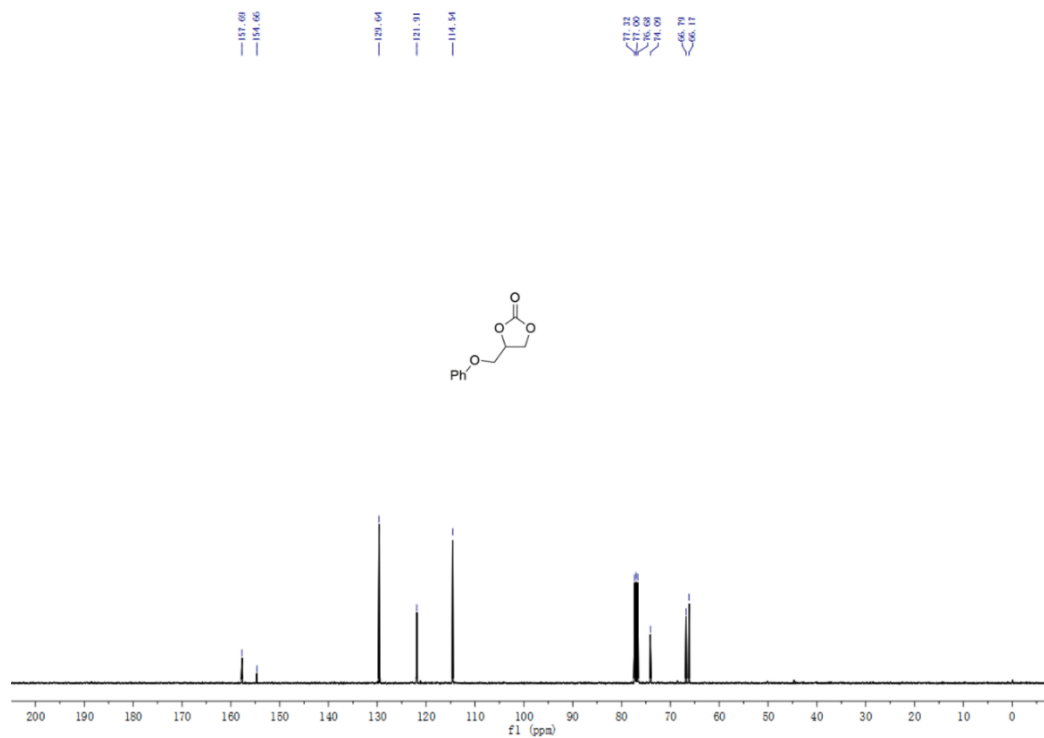

Figure S53. <sup>13</sup>C NMR (CDCl<sub>3</sub>) spectrum for (21).

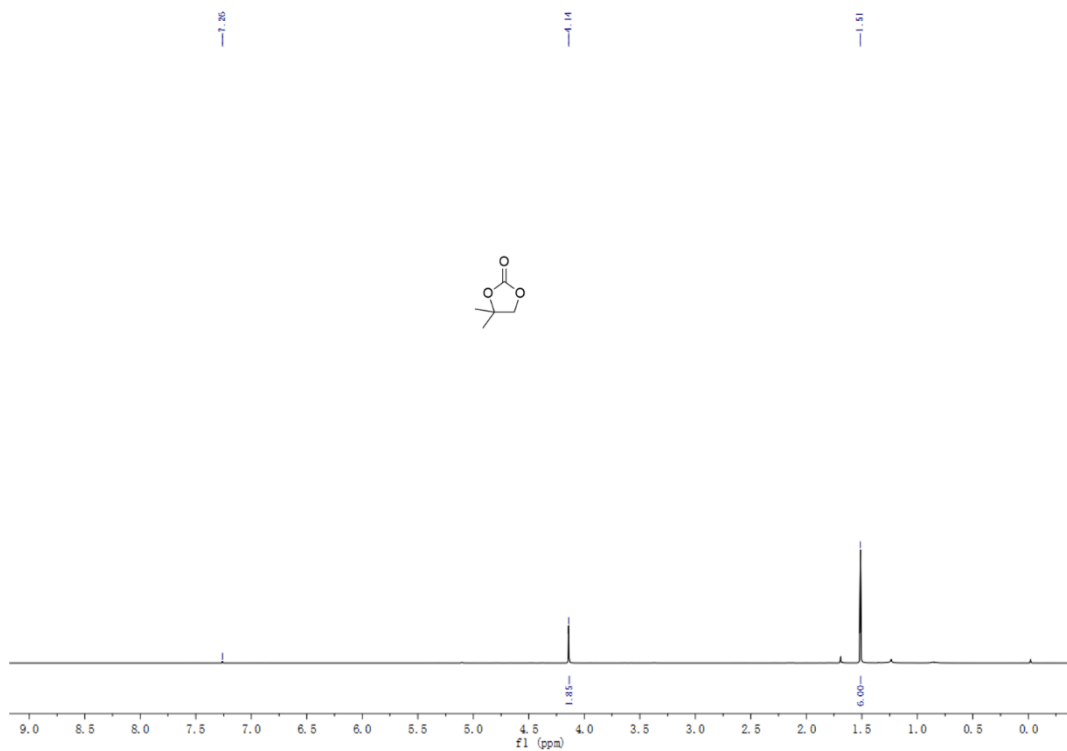

**Figure S54.** <sup>1</sup>H NMR (CDCl<sub>3</sub>) spectrum for (2m).

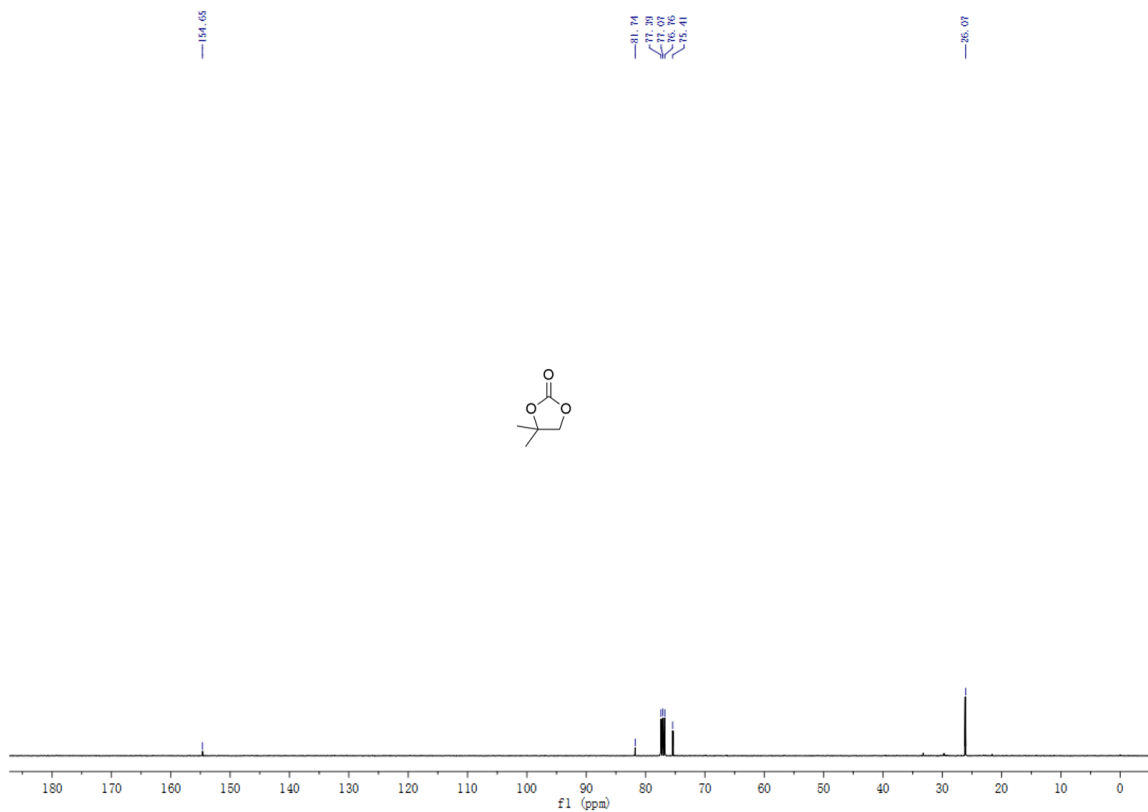

**Figure S55.** <sup>13</sup>C NMR (CDCl<sub>3</sub>) spectrum for (2m).

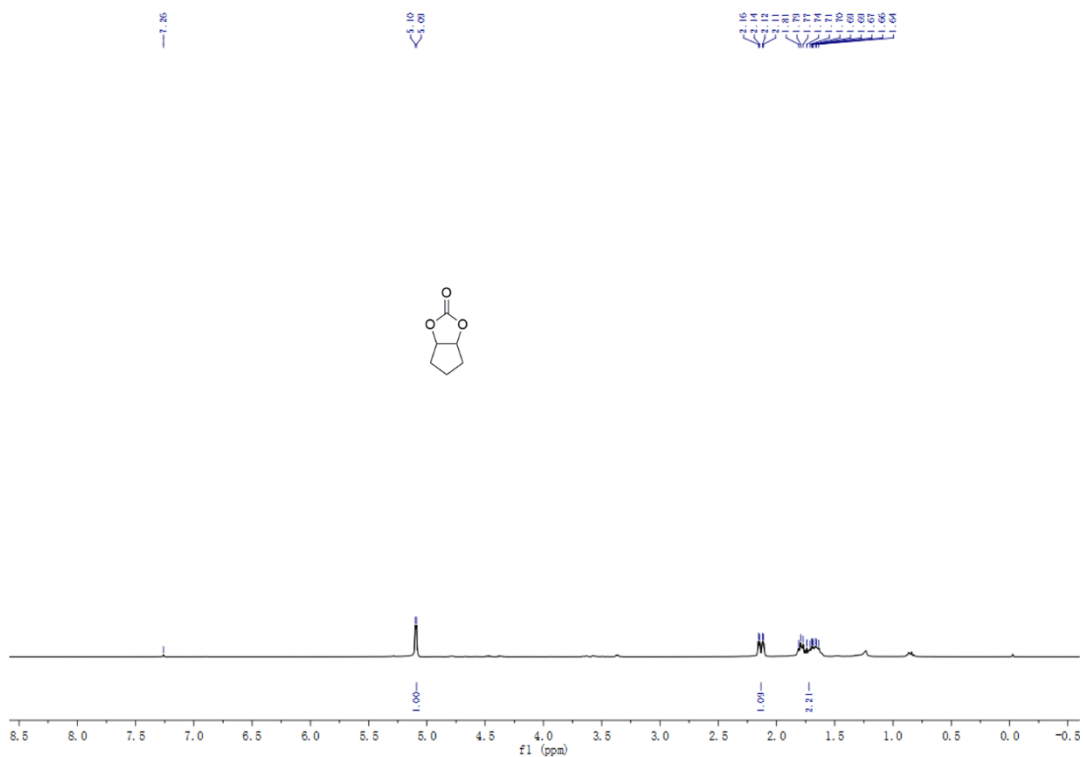

**Figure S56.** <sup>1</sup>H NMR (CDCl<sub>3</sub>) spectrum for (2n).

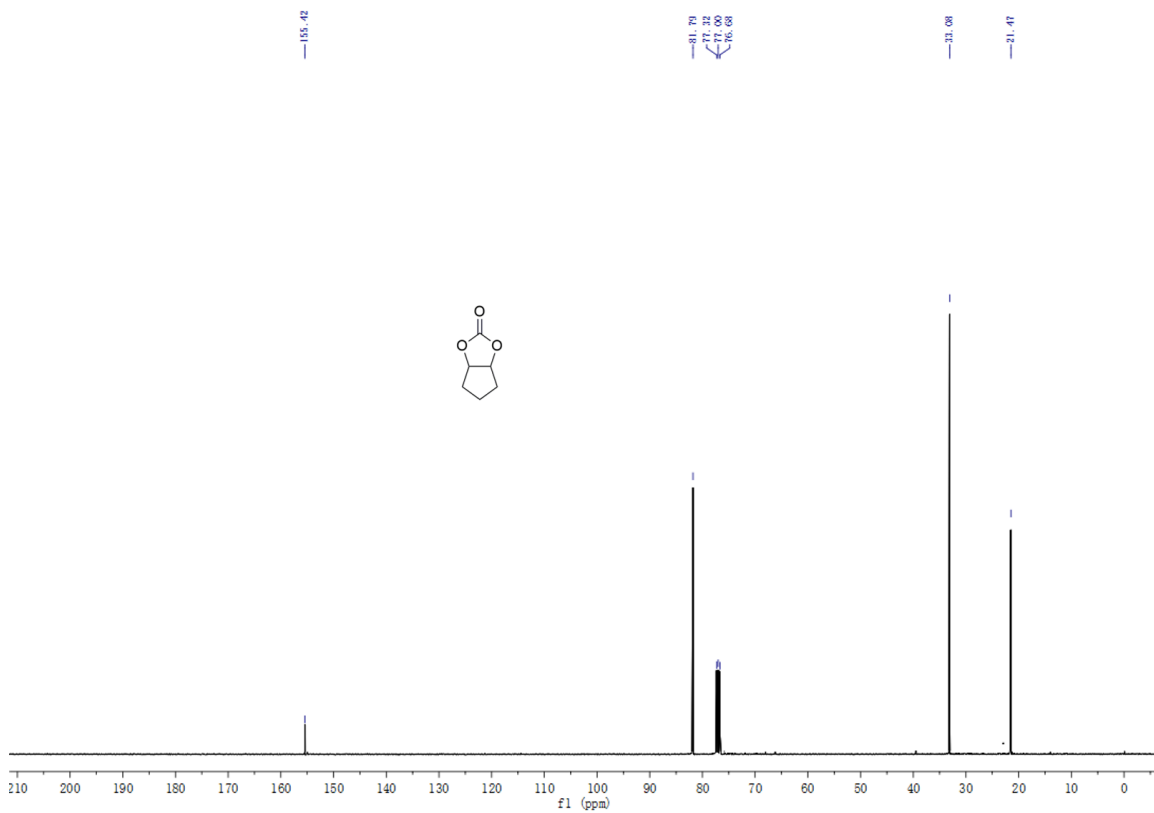

**Figure S57.** <sup>13</sup>C NMR (CDCl<sub>3</sub>) spectrum for (2n).



## Notes and references

- 1 Q. Han, L. Wang, Z. Shi, C. Xu, Z. Dong, Z. Mou and W. Liu, *Chem. Asian J.*, 2017, **12**, 1364-1373.
- 2 L. Hua, B. Li, C. Han, P. Gao, Y. Wang, D. Yuan and Y. Yao, *Inorg. Chem.*, 2019, **58**, 8775-8786.
- 3 U. Bayer, D. Werner, C. Maichle-Mössmer and R. Anwander, *Angew. Chem. Int. Ed.*, 2020, **59**, 5830-5836.
- 4 W. Hou, G. Wang, X. Wu, S. Sun, C. Zhao, W.-S. Liu and F. Pan, *New J. Chem.*, 2020, **44**, 5019-5022.
